# Supplementary material for: Single-cell analysis reveals the loss of FABP4-positive proliferating valvular endothelial cells relates to functional mitral regurgitation
Source: PubMed Central journal article supplement — BMC Med. 2024 Dec 20;22:595. doi: 10.1186/s12916-024-03791-4 (PMC11662534; doi:10.1186/s12916-024-03791-4), 2024-12-20
Supplement: 12916_2024_3791_MOESM1_ESM.pdf [file 12916_2024_3791_MOESM1_ESM.pdf]

## Data Supplement

### **Single-cell analysis reveals the loss of FABP4-positive proliferating valvular endothelial cells relates to functional mitral regurgitation**

#### **Running title: single cell RNA sequencing and human mitral regurgitation**

Xiaohu Wang, MD <sup>#,1</sup>, Mengxia Fu, MD, PhD <sup>#,2</sup>, Weiteng Wang, MD<sup>#,1</sup>, Songren Shu, MD <sup>1,3</sup>, Ningning Zhang, BS <sup>1,3</sup>, Ruojin Zhao, MD <sup>1,3</sup>, Xiao Chen, MD <sup>1,3</sup>, Xiumeng Hua, MD, PhD <sup>1,3,4</sup>, Xin Wang, MD, PhD <sup>1,3,4</sup>, Wei Feng, MD, PhD <sup>1,3,4</sup>, Xianqiang Wang, MD, PhD <sup>1,3,4\*</sup>, Jiangping Song, MD, PhD <sup>1,3,4,5,\*</sup>

<sup>1</sup>State Key Laboratory of Cardiovascular Disease, Fuwai Hospital, National Center for Cardiovascular Diseases, Chinese Academy of Medical Sciences and Peking Union Medical College, Beijing, China.

<sup>2</sup>Galactophore Department, Galactophore Center, Beijing Shijitan Hospital, Capital Medical University, Beijing, China.

<sup>3</sup>The Cardiomyopathy Research Group, Fuwai Hospital, National Center for Cardiovascular Diseases, Chinese Academy of Medical Sciences and Peking Union Medical College, Beijing, China.

<sup>4</sup>Department of Cardiovascular Surgery, Fuwai Hospital, National Center for Cardiovascular Diseases, Chinese Academy of Medical Sciences and Peking Union Medical College, Beijing, China.

<sup>5</sup>Shenzhen Key Laboratory of Cardiovascular Disease, Fuwai Hospital Chinese Academy of Medical Sciences, Shenzhen, China.

1 # Xiaohu Wang , Mengxia Fu and Weiteng Wang contributed equally to this work.

2 **\*Corresponding author**

3 **Xianqiang Wang, MD, PhD**

4 Present address: 167A Beilishi Road, Xi Cheng District, Beijing, 100037, China.

5 E-mail address: qiangxianwang@163.com

6 **Jiangping Song, MD, PhD**

7 Present address: 167A Beilishi Road, Xi Cheng District, Beijing, 100037, China.

8 E-mail address: fwsongjiangping@126.com

1 **Methods:**

2 **Echocardiographic**

3 Patient medical histories and clinical characteristics, as recorded by physicians at our  
4 institution, were obtained without any modifications from electronic records. Vital  
5 signs were measured during the echocardiography procedure. Echocardiographic  
6 examinations were conducted by multiple trained sonographers and reviewed by  
7 cardiologists at Fuwai Hospital (Beijing, China) using commercially available  
8 machines, as part of routine clinical practice. The measurements were performed  
9 according to clinical recommendations for assessing regurgitation and cardiac cavities.  
10 Following the echocardiography, the cardiologists graded mitral regurgitation as  
11 none/trivial, mild, moderate, or severe by considering all signs and measures  
12 recommended by guidelines<sup>(13)</sup>. This included the quantification of effective  
13 regurgitant orifice area (EROA) and regurgitant volume, which were regarded as zero  
14 when no or trivial regurgitation was present. Echocardiographic data, both qualitative  
15 and quantitative, were obtained directly from the original reports via electronic  
16 transfer.

17

18 **Gender/Age correlation analysis**

19 We used AverageExpression function of Seurat package to count average expression  
20 level of top 500 HVGs (High Variable Features) within each gender (Male/Female) or  
21 age (Adult/Children) group. The HVGs were calculated earlier by  
22 FindVariableFeatures function. To perform the pearson correlation test between

1 gender group or age group, the cor.test function of stats (v 4.1.2) package was  
 2 employed.

3

4 **Software:**

|                             |                                                                                                                         |
|-----------------------------|-------------------------------------------------------------------------------------------------------------------------|
| R (v4.1.2)                  | <a href="https://www.r-project.org/">https://www.r-project.org/</a>                                                     |
| Cell Ranger<br>(v3.1.0)     | <a href="https://support.10xgenomics.com/">https://support.10xgenomics.com/</a>                                         |
| Seurat (v4.1.1)             | <a href="https://satijalab.org/seurat/">https://satijalab.org/seurat/</a>                                               |
| clusterProfiler<br>(v4.2.2) | <a href="https://github.com/YuLab-SMU/clusterProfiler">https://github.com/YuLab-SMU/clusterProfiler</a> <sup>(14)</sup> |
| pySCENIC<br>(v0.11.2)       | <a href="https://github.com/aertslab/pySCENIC">https://github.com/aertslab/pySCENIC</a> <sup>(15)</sup>                 |
| pheatmap (v1.0.12)          | <a href="https://github.com/raivokolde/pheatmap">https://github.com/raivokolde/pheatmap</a>                             |
| scrn (v1.22.1)              | <a href="https://github.com/MarioniLab/scrn">https://github.com/MarioniLab/scrn</a>                                     |
| ReactomePA (v<br>1.38.0)    | <a href="https://github.com/YuLab-SMU/ReactomePA">https://github.com/YuLab-SMU/ReactomePA</a> <sup>(17)</sup>           |
| CellChat (v1.4.0)           | <a href="https://github.com/sqjin/CellChat">https://github.com/sqjin/CellChat</a> <sup>(18)</sup>                       |
| velocity<br>(v0.17.17)      | <a href="https://github.com/velocity-team/velocity.py">https://github.com/velocity-team/velocity.py</a> <sup>(19)</sup> |
| scvelo (v0.2.5)             | <a href="https://github.com/theislab/scvelo">https://github.com/theislab/scvelo</a> <sup>(20)</sup>                     |
| slingshot (v2.5.2)          | <a href="https://github.com/kstreet13/slinsshot">https://github.com/kstreet13/slinsshot</a> <sup>(21)</sup>             |
| tradeSeq (v1.8.0)           | <a href="https://github.com/statOmics/tradeSeq">https://github.com/statOmics/tradeSeq</a> <sup>(22)</sup>               |



|                  |                                                                                         |
|------------------|-----------------------------------------------------------------------------------------|
| ggplot2 (v3.3.6) | <a href="https://github.com/tidyverse/ggplot2">https://github.com/tidyverse/ggplot2</a> |
| DESeq2 (v1.34.0) | <a href="https://github.com/mikelove/DESeq2">https://github.com/mikelove/DESeq2</a>     |

1

## 2 **Immunohistochemistry (IHC) staining**

3 IHC staining of mitral valve tissue was performed with FABP4 polyclonal antibody  
4 (1:300, ab92501, Abcam) according to standard protocols. The paraffin sections were  
5 placed in an oven at 55 °C for 12-16 hours, dewaxed and rehydrated with xylene and  
6 ethanol, and washed three times with phosphate-buffered saline (PBS) (pH = 7.4) for  
7 2 min. The antigens were then repaired with AR6 buffer solution (PerkinElmer) and  
8 endogenous peroxidase was blocked with 3% hydrogen peroxide. The slides were  
9 blocked with 3% BSA at room temperature for 60 min and then incubated with  
10 FABP4 polyclonal antibody (1:300, ab92501, Abcam) at 4 °C overnight. Finally, the  
11 paraffin slices were subjected to secondary antibody blocking, DAB staining, nuclear  
12 restaining, and dehydration. The number of positive cells of IHC staining of FABP4  
13 in valve tissue was scored by two independent pathologists.

14

## 15 **Opal multicolor IHC staining and tissue image analysis**

16 A total of 3 MR and 3 NC specimens were fixed in formalin, embedded in paraffin,  
17 and were sectioned (5 µm thick) sequentially. Antigen retrieval was carried out using  
18 AR6 buffer solution (PerkinElmer). The antigen block lasted for 10 min (PerkinElmer)  
19 and then incubated overnight with rabbit monoclonal anti-FABP4 antibody (1:200,  
20 ab92501, Abcam), mouse monoclonal anti-CD31 antibody (OTI8A9, Zsbio), rabbit

1 monoclonal anti-vWF antibody (1:200, ab6994, Abcam) and mouse monoclonal  
2 anti-ACTA2 antibody (1:300, ab7817, Abcam). The secondary antibody and staining  
3 were obtained from an Opal 7-color IHC detection kit (PerkinElmer), and  
4 4',6-diamidino-2-phenylindole (DAPI) was used to make the cell nuclei visible. The  
5 positive cell infiltration of the valve slides was scanned by a multi-spectrum imaging  
6 instrument for immunohistochemistry (PerkinElmer Vectra), and the images were  
7 analyzed using Phenochart software (PerkinElmer). Violin Plots were plotted using  
8 GraphPad Prism 9.0

9

#### 10 **Immunofluorescence staining**

11 The cell immunofluorescence method involved fixing cells with 4%  
12 paraformaldehyde (P0099, Beyotime) when cell confluence reached 50-70%.  
13 Subsequently, cell permeabilization was achieved using 0.3% Triton X-100 (T8787,  
14 SIGMA). Nonspecific binding was blocked using a blocking solution (P0102,  
15 Beyotime,). Primary antibodies, including ki-67(1:200, 27309-1-AP, Proteintech,),  
16 CD34(1:100, 60180-1-Ig, Proteintech), and FABP4(1:200, ab92501, Abcam) were  
17 applied and incubated overnight at 4°C. The following day, cells were incubated with  
18 antibodies including Goat anti-Mouse Secondary Antibody(1:200, A32723,  
19 ThermoFisher) and Goat anti-Rabbit Secondary Antibody(1:200, A11037,  
20 ThermoFisher) . Finally, fluorescent mounting medium containing DAPI ( Zsbio,  
21 ZLI-9556 ) was used for slide mounting. Imaging was conducted using a confocal

1 fluorescence microscope (Zeiss LSM800), and data analysis was performed using  
2 Image J (Version, 1.8.0) for quantification.

3

#### 4 **Cell scratch assay**

5 First, cells are seeded into a 96-well plate. When the cell confluence reaches 70%,  
6 Cell Migration Kit (BA-04858, Incucyte) is used to create a scratch. Rinse each well  
7 twice with 100  $\mu$ l PBS. Then Serum-free DMEM was used for cell culture.  
8 Subsequently, cell migration is observed at 0, 12, and 24 hours, respectively. Images  
9 were captured using a Zeiss microscope (Axio Observer D1, Carl Zeiss, Jena,  
10 Germany). Data analysis was conducted using ImageJ software (version 1.49,  
11 National Institutes of Health, Bethesda, MD).

12

#### 13 **Edu assay**

14 Cells were seeded at a density of 1,500 cells per well in 96-well plates. Following  
15 various treatments, VECs were cultured in a medium containing EdU for 2 hours at  
16 37°C with 5% CO<sub>2</sub>. Afterward, the cells were fixed with 4% paraformaldehyde  
17 (P0099, Beyotime) for 15 minutes, washed several times with PBS, stained with  
18 Apollo staining solution for 30 minutes and then stained with DAPI. Finally, the cells  
19 were observed using a fluorescence microscope (Opera Phenix Plus High-Content  
20 Screening System, PerkinElmer). The EdU assay kit was procured from Ribobio Bio  
21 (Guangzhou, China).

22

1 **Transient transfection**

2 A siRNA (small interfering RNA) was used to silence FABP4 (si-FABP4-2, 5'-  
3 CAAGAGCACCAUAACCUUATT -3', designed and synthesized by Hanbio;  
4 Shanghai, China) in VEC. Cells transfected with scramble siRNA (5'-  
5 UUCUCCGAACGUGUCACGUTT -3', Hanbio) were used as controls. Cells were  
6 grown in 6-well dishes and transiently transfected with SmartPool siRNA (5 nM,  
7 Hanbio) using LipoFiter 3.0 (Hanbio). Experiments were performed 48h after  
8 transfection. Then, the cells and culture supernatant were collected for the subsequent  
9 experiments.

10

11 **Western Blot**

12 Protein samples are first separated by SDS-PAGE gel electrophoresis (NP0323BOX,  
13 Invitrogen). Subsequently, the separated proteins are transferred onto a PVDF  
14 membrane (IB401032, Invitrogen). The membrane is then blocked by blocking buffer  
15 (P0023B, Beyotime) and probed with primary antibody, including Vimentin (1:5000,  
16 ab247342, Abcam) and FABP4 (1:5000, Ab92501, Abcam) in 4 °C overnight.  
17 Following that, the Goat anti-Mouse Secondary Antibody (1:5000, A16072,  
18 Invitrogen) is used. Finally, Enhanced Chemiluminescence (32209, Invitrogen) are  
19 employed to visualize and quantify protein bands.

20

1 **Table S1 in supplement. Information of patients enrolled in the study.**

2 **A. Information of patients for scRNA-seq**

|                              | NC1  | NC2   | NC3  | MR1    | MR2    | MR3      |
|------------------------------|------|-------|------|--------|--------|----------|
| <b>Age, y</b>                | 26   | 33    | 17   | 10     | 35     | 48       |
| <b>Diagnosis</b>             | RCM  | HCM   | ARVC | DCM    | DCM    | HCM      |
| <b>Hypertension</b>          | No   | No    | No   | No     | No     | No       |
| <b>Diabetes mellitus</b>     | No   | No    | No   | No     | No     | No       |
| <b>Hyperlipidemia</b>        | No   | No    | No   | No     | No     | No       |
| <b>NYHA class</b>            | IV   | III   | III  | IV     | III    | III      |
| <b>BMI, kg/m<sup>2</sup></b> | 24.9 | 21.2  | 25.6 | 21.1   | 24.6   | 20.8     |
| <b>Echocardiography</b>      |      |       |      |        |        |          |
| <b>LVEF, %</b>               | 62   | 29    | 35   | 22     | 28     | 37       |
| <b>AV peak velocity, m/s</b> | 1.3  | 0.8   | 1.0  | 1.3    | 1      | 1.4      |
| <b>AV mean PG, mmHg</b>      | 6.8  | 2.6   | 4.0  | 6.8    | 4      | 0.6      |
| <b>AV regurgitation</b>      | No   | No    | No   | No     | No     | No       |
| <b>PV peak velocity, m/s</b> | 1.6  | 0.8   | 0.7  | 3      | 1      | 0.6      |
| <b>PV mean PG, mmHg</b>      | 10.2 | 2.6   | 2.0  | 36     | 4      | 1.4      |
| <b>PV regurgitation</b>      | No   | No    | No   | Severe | No     | No       |
| <b>TV mean PG, mmHg</b>      | 36   | 31.4  | 21.2 | 29.2   | 21.2   | 36       |
| <b>TV regurgitation</b>      | Mild | Mild  | No   | No     | No     | No       |
| <b>MV mean PG, mmHg</b>      | 3.2  | 2.6   | 1.4  | 4      | 2.6    | 1        |
| <b>MV regurgitation</b>      | No   | Trace | No   | Severe | Severe | Moderate |

3 **B. Information of patients for staining**

| No | Age | Diagnosis | MV regurgitation |
|----|-----|-----------|------------------|
| 1  | 61  | ARVC      | Mild             |
| 2  | 46  | HCM       | None             |

|    |    |      |          |
|----|----|------|----------|
| 3  | 62 | ARVC | Trace    |
| 4  | 33 | HCM  | Mild     |
| 5  | 15 | ARVC | Mild     |
| 6  | 10 | DCM  | Mild     |
| 7  | 50 | DCM  | Trace    |
| 8  | 54 | DCM  | Mild     |
| 9  | 10 | DCM  | Mild     |
| 10 | 26 | RCM  | Trace    |
| 11 | 49 | HCM  | Mild     |
| 12 | 33 | HCM  | Mild     |
| 13 | 49 | DCM  | Moderate |
| 14 | 56 | DCM  | Moderate |
| 15 | 63 | DCM  | Moderate |
| 16 | 16 | DCM  | Moderate |
| 17 | 66 | DCM  | Moderate |
| 18 | 28 | HCM  | Moderate |
| 19 | 53 | DCM  | Moderate |
| 20 | 26 | HCM  | Moderate |
| 21 | 55 | DCM  | Moderate |
| 22 | 30 | DCM  | Moderate |
| 23 | 7  | DCM  | Moderate |
| 24 | 33 | DCM  | Severe   |

|    |    |     |        |
|----|----|-----|--------|
| 25 | 50 | DCM | Severe |
| 26 | 65 | HCM | Severe |
| 27 | 10 | DCM | Severe |
| 28 | 57 | DCM | Severe |
| 29 | 4  | DCM | Severe |
| 30 | 65 | DCM | Severe |
| 31 | 37 | DCM | Severe |
| 32 | 58 | HCM | Severe |
| 33 | 35 | DCM | Severe |

1

2 RCM, Restrictive cardiomyopathy; DCM, dilated cardiomyopathy; ARVC,  
3 arrhythmogenic right ventricular cardiomyopathy; HCM, hypertrophic  
4 cardiomyopathy; BMI, body mass index; LVEF, left ventricular ejection fraction; AV,  
5 aortic valve; PG, pressure gradient; PV, pulmonary valve; TV, tricuspid valve; MV,  
6 mitral valve;

7

1 **Table S2 in supplement. Quality control results.**

| <b>Sample</b>                   | <b>NC1</b> | <b>NC2</b> | <b>NC3</b> | <b>MR1</b> | <b>MR2</b> | <b>MR3</b> |
|---------------------------------|------------|------------|------------|------------|------------|------------|
| <b>CellCount.Raw</b>            | 8731       | 6418       | 8618       | 9053       | 6821       | 9807       |
| <b>HBBPositiveCellCount.Raw</b> | 493        | 31         | 124        | 550        | 573        | 6          |
| <b>CellCount.Filtered</b>       | 7260       | 5858       | 7954       | 7571       | 5601       | 9137       |
| <b>MedianUMICount.Raw</b>       | 4920       | 5712       | 6427       | 5249       | 3664       | 4630       |
| <b>MedianUMICount.Filtered</b>  | 4462       | 5497       | 6263       | 5048       | 3022       | 4540       |
| <b>MeanUMICount.Raw</b>         | 6609.0032  | 6568.7703  | 6958.2686  | 6479.6651  | 5850.4461  | 5584.3884  |
| <b>MeanUMICount.Filtered</b>    | 4875.4534  | 5680.816   | 6389.6538  | 5322.4097  | 4315.9454  | 4934.5902  |
| <b>MedianGeneCount.Raw</b>      | 2151       | 2431.5     | 2403       | 2135       | 1555       | 1905       |
| <b>MedianGeneCount.Filtered</b> | 2027       | 2370       | 2354       | 2080       | 1348       | 1884       |
| <b>MeanGeneCount.Raw</b>        | 2318.4256  | 2481.5469  | 2388.8458  | 2240.7865  | 1895.5945  | 2038.8239  |
| <b>MeanGeneCount.Filtered</b>   | 2018.1499  | 2321.0073  | 2283.1758  | 2053.6414  | 1620.6035  | 1923.5082  |
| <b>MedianPercentMT.Raw</b>      | 1.9380775  | 1.2651698  | 1.1969881  | 2.4595613  | 1.2141816  | 3.0794406  |
| <b>MedianPercentMT.filtered</b> | 1.9850758  | 1.287779   | 1.2017659  | 2.4513473  | 1.1792453  | 3.0746706  |
| <b>MeanPercentMT.Raw</b>        | 2.5106638  | 1.7529317  | 1.6471653  | 3.2568067  | 1.8147522  | 3.5989679  |
| <b>MeanPercentMT.filtered</b>   | 2.2412468  | 1.6022727  | 1.408359   | 2.7945014  | 1.5444632  | 3.3241006  |

2

3



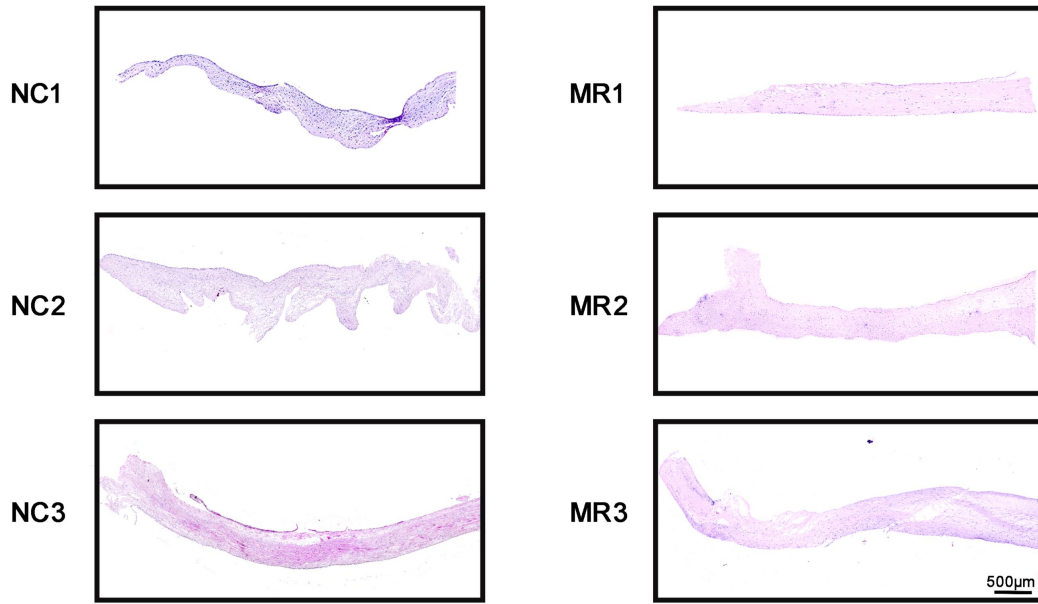

1

2 **Figure S1. Histological examination (HE staining) of mitral valve corresponding**

3 **to each patient. NC, non-diseased control; MR, mitral regurgitation.**

4

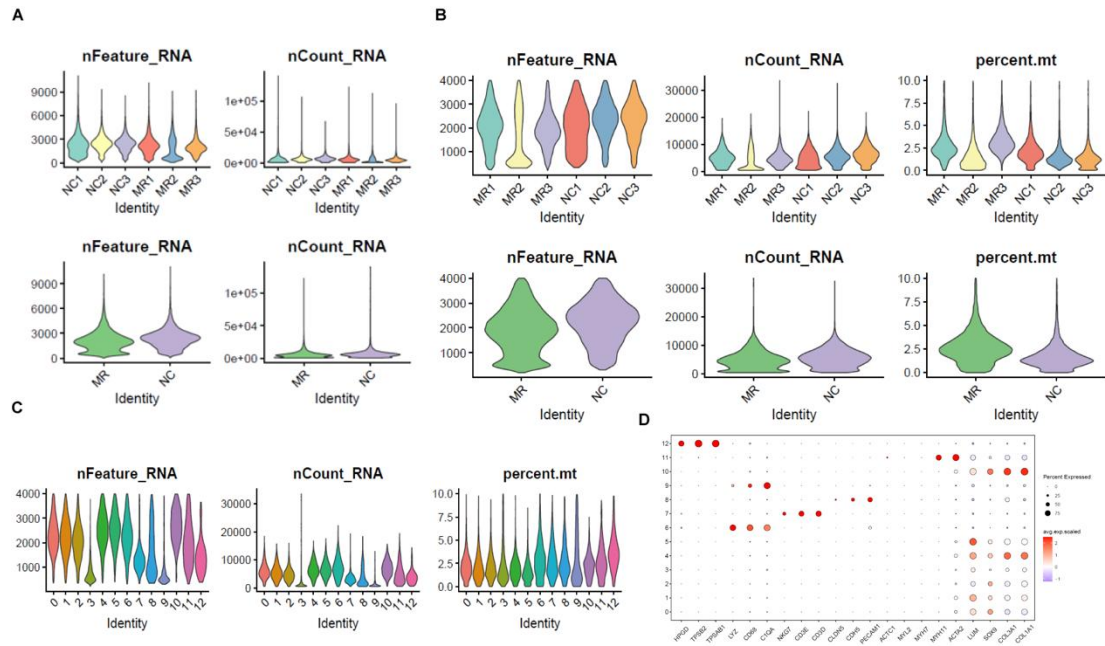

1

2 **Figure S2. Quality control for scRNA-seq datasets. A-B.** nFeature\_RNA,

3 nCount\_RNA and Percent\_mt of scRNA-seq datasets before (A) and after (B) filter.

4 C. nFeature\_RNA, nCount RNA and Percent of each cell cluster showed the low

5 quality clusters. D. Canonical marker genes of different cell types defined cell clusters.

6 NC, non-diseased control; MR, mitral regurgitation.

7

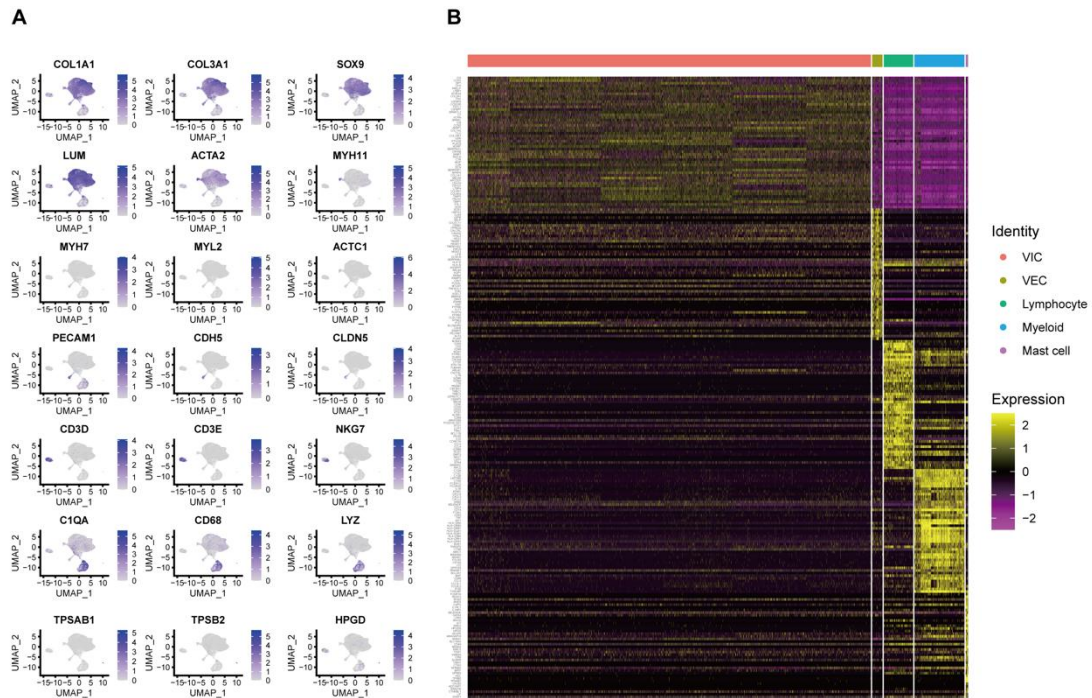

1

2 **Figure S3. Identification of valve cells.** A. UMAP of canonical marker genes in  
 3 valve cell. UMAP plots showing post-QC data; cells are color-coded for canonical  
 4 marker genes. Color scale: blue, high expression; gray, low expression. B.  
 5 Gene-expression heatmap of the top 50 marker genes for each cell type. Color scale:  
 6 yellow, high expression; purple, low expression. UMAP, uniform manifold  
 7 approximation and projection; VIC, valvular interstitial cell; VEC, valvular  
 8 endothelial cell.

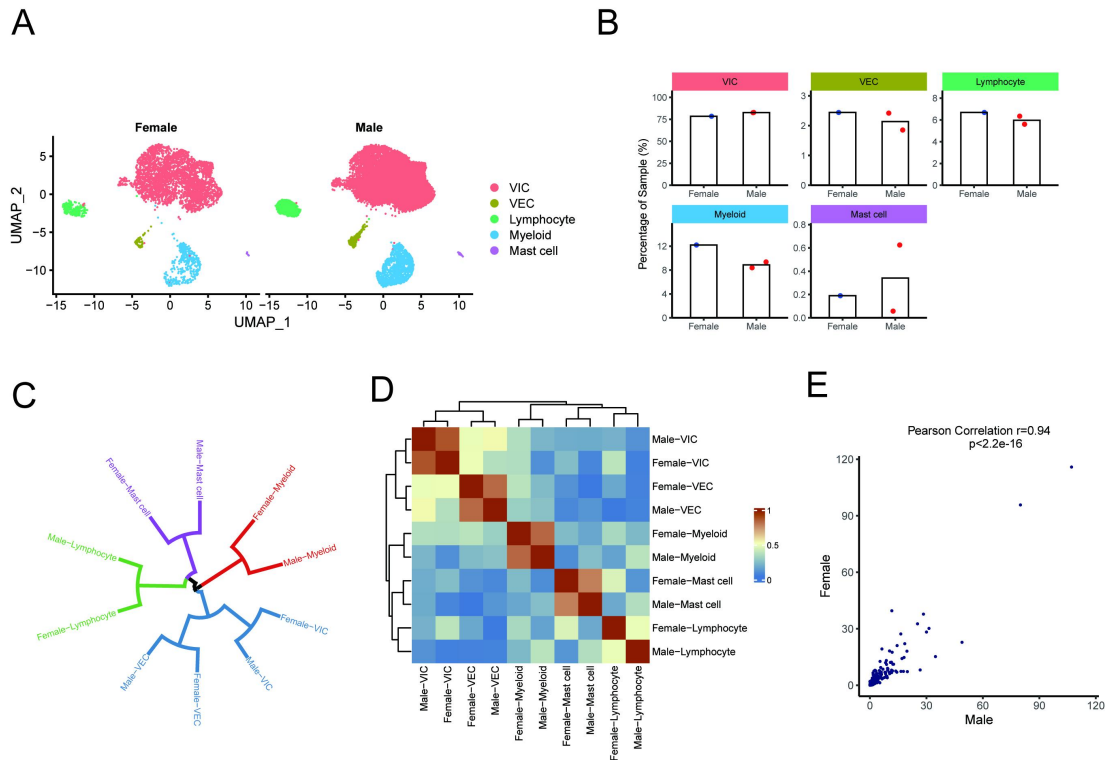

1

2 **Figure S4. Potential effects of gender on the cellular landscape of mitral**

3 **regurgitation valves. A.** Separate UMAP plot for cells from two male and one

4 female. **B.** The ratio of each cellular clusters in MR valves from male and female.

5 Each dot represents one valve sample. The Student's t-test with Welch's correction

6 was performed to compare the log transformed proportion of cell subpopulations. **C.**

7 Hierarchical clustering of six cellular clusters among MR valves from male or female.

8 **D.** Heatmap showing the Pearson correlation coefficient among six major cellular

9 clusters among MR valves from male or female. **E.** Pearson correlation analysis of the

10 all detected genes in valves from two male and one female.

11

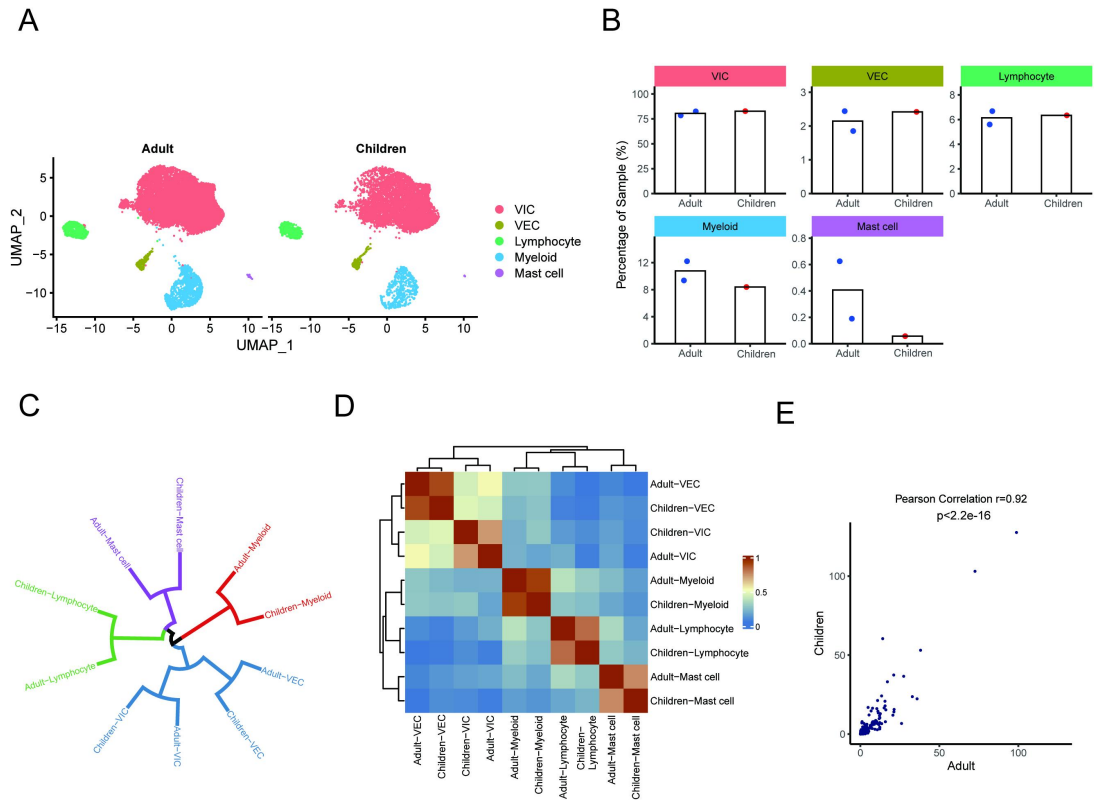

1

2 **Figure S5. Potential effects of age on the cellular landscape of mitral**

3 **regurgitation valves. A.** Separate UMAP plot for cells from two adults and one child.

4 **B.** The ratio of each cellular clusters in MR valves from adults and children. Each dot

5 represents one valve sample. The Student's t-test with Welch's correction was

6 performed to compare the log transformed proportion of cell subpopulations. **C.**

7 Hierarchical clustering of six cellular clusters among MR valves from adult or

8 children. **D.** Heatmap showing the Pearson correlation coefficient among six major

9 cellular clusters among MR valves from adult or children. **E.** Pearson correlation

10 analysis of the all detected genes in valves from two adults and one child.

11

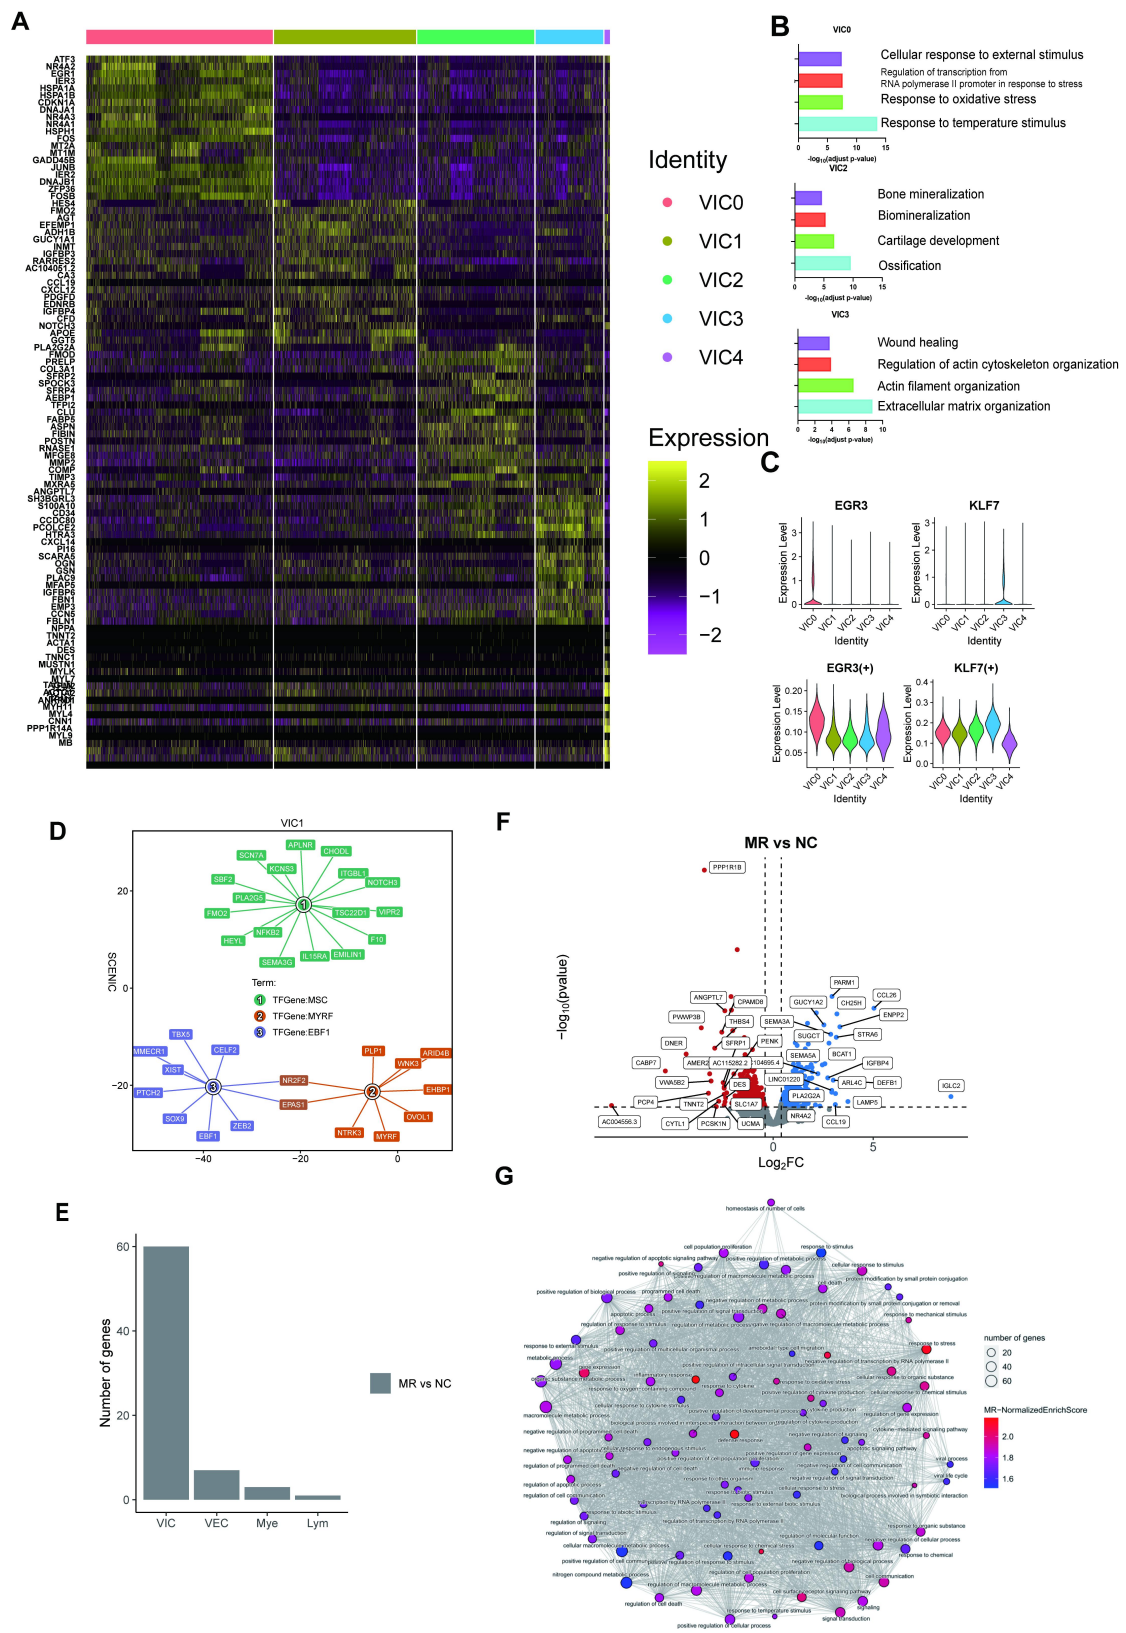

1  
 2 **Figure S6. VIC subclusters helps the valve change its structure to accommodate**  
 3 **hemodynamic changes. A. Gene-expression heatmap of the top 20 marker genes for**

1 each VIC subcluster. Color scale: yellow, high expression; purple, low expression. **B.**  
2 Selected top GO enrichment terms related to corresponding differential expressed  
3 genes (DEGs). **C.** The expression level and regulon activity of TFs EGR3 and KLF7  
4 in each VIC cluster. **D.** A network diagram of TFs and their downstream regulated  
5 genes. **E.** Bar chart depicting the number of differential genes among different  
6 subgroups. **F.** Differential gene expression of VIC2 in NC group and MR group are  
7 shown in a volcano plot. **G.** Network view of the differentially regulated  
8 REACTOME pathways in VIC in the TR. The size of the dot reflects the size of the  
9 gene set. The dots in red denote high-upregulated pathways, and the dots in blue  
10 represent low-upregulated pathways. The significance threshold of the GSEA test was  
11 set to a p value of 0.05. NC, non-diseased control; MR, mitral regurgitation.



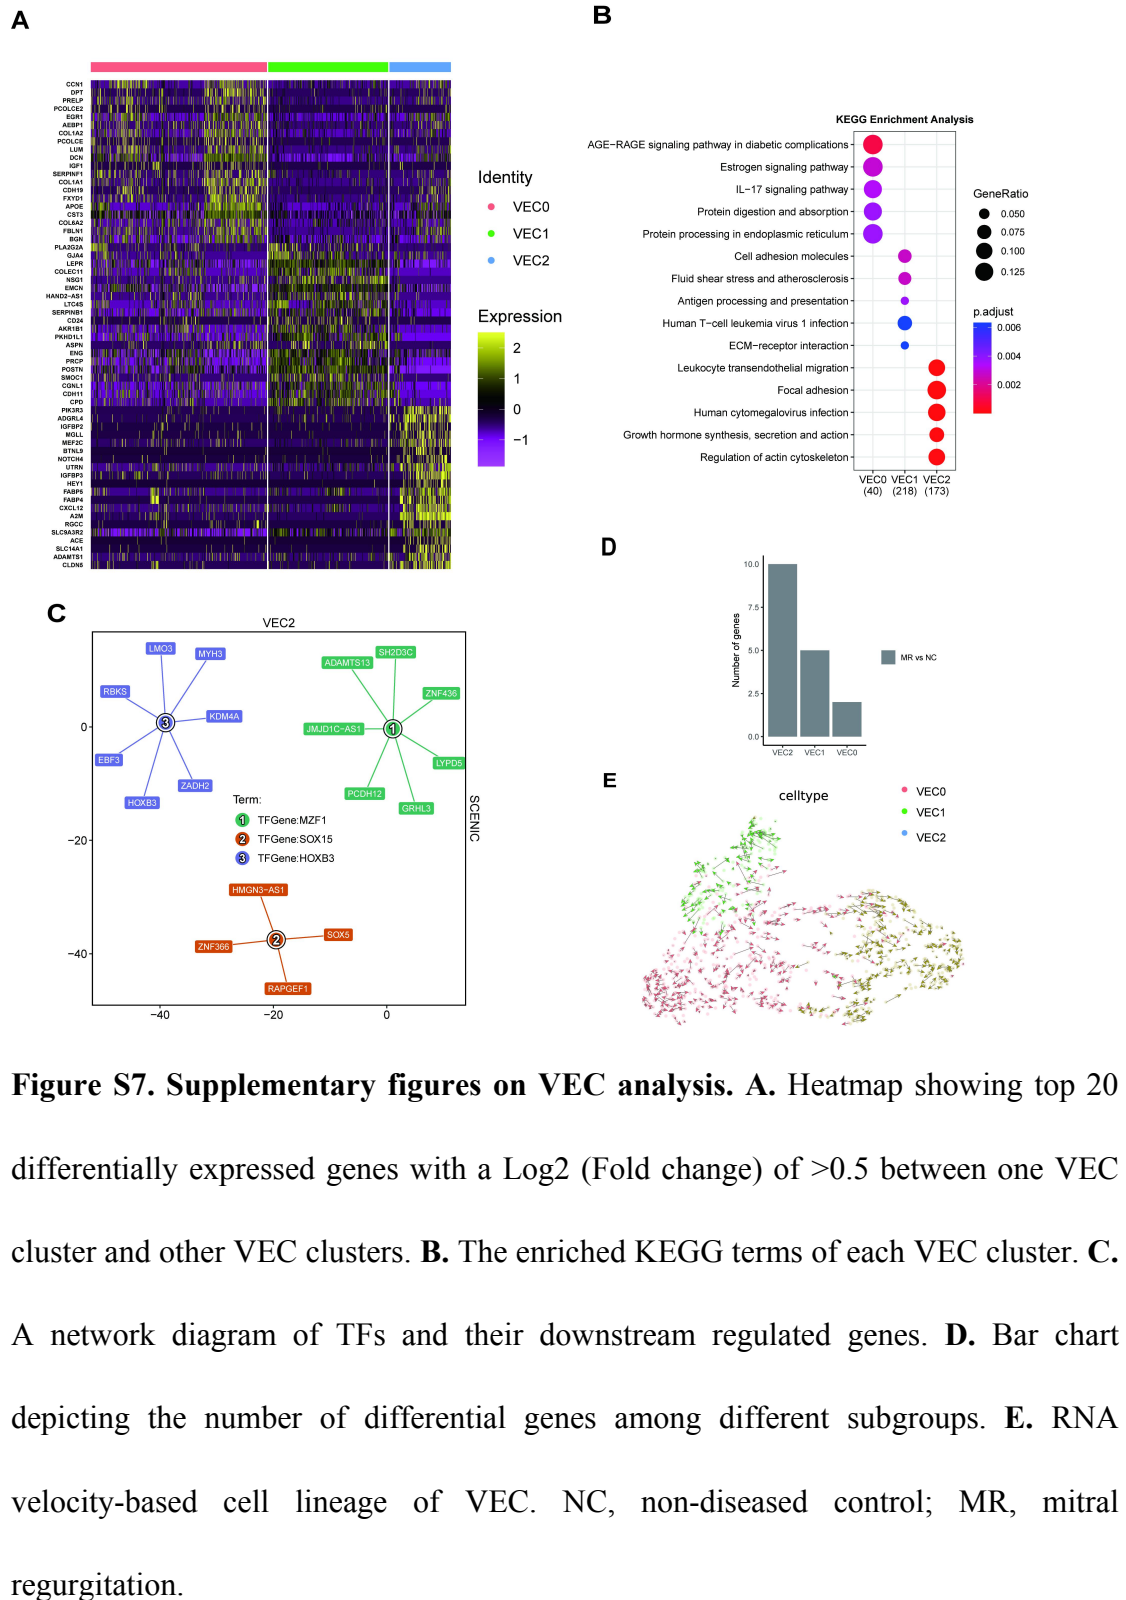



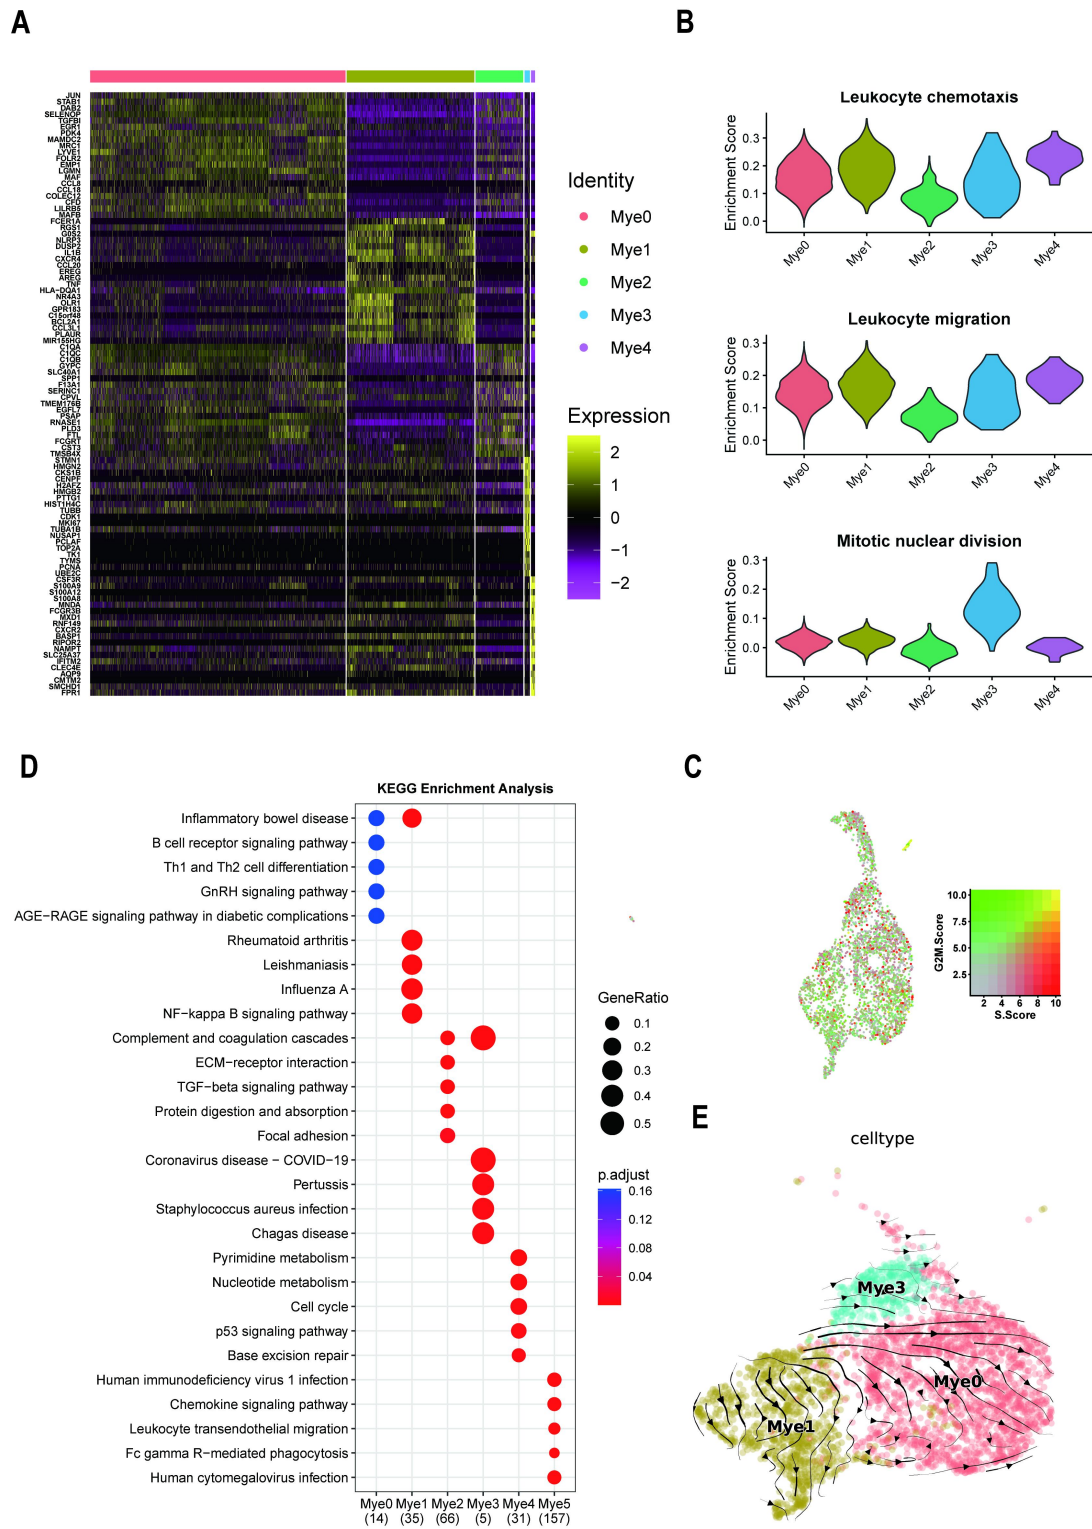

1  
2

3 **Figure S8. Supplementary figures on myeloid analysis. A.** Heatmap showing top  
4 20 differentially expressed genes with a Log2 (Fold change) of >0.5 between one  
5 Myeloid cluster and other Myeloid clusters. **B.** The enrichment scores of four

1 different biological processes in each Myeloid subcluster. **C.** The cell cycle phases of  
2 individual cells in each population predicted using Seurat CellCycleScoring. UMAP  
3 plot showing the cell cycle phase of myeloid. Red and green points correspond to  
4 cells at S phase and G2/M phase, respectively. **D.** The enriched KEGG terms of each  
5 Myeloid cluster. **E.** RNA velocity-based cell lineage of Myeloid.

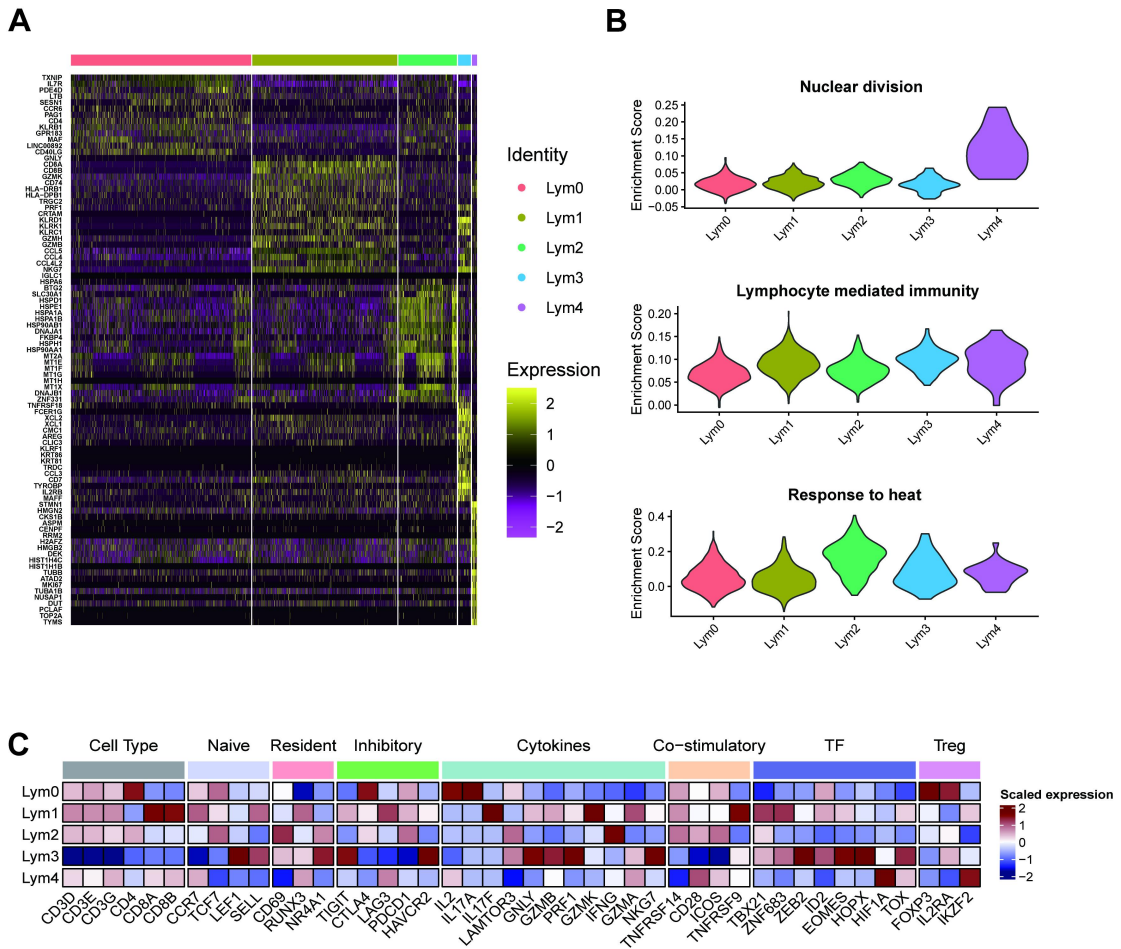

1

2

3

4

5

6

7

8

9

**Figure S9. Supplementary figures on Lymphocyte analysis.** **A.** Heatmap showing top 20 differentially expressed genes with a Log2 (Fold change) of >0.5 between one Lymphocyte cluster and other Lymphocyte clusters. **B.** The enrichment scores of four different biological processes in each Lymphocyte subclusters. **C.** Markers of cell types, naive T cells, Resident T cells, inhibitory T cells, cytokines, co-stimulatory chemokines, TF and Treg in each cluster was delivered in heatmap.

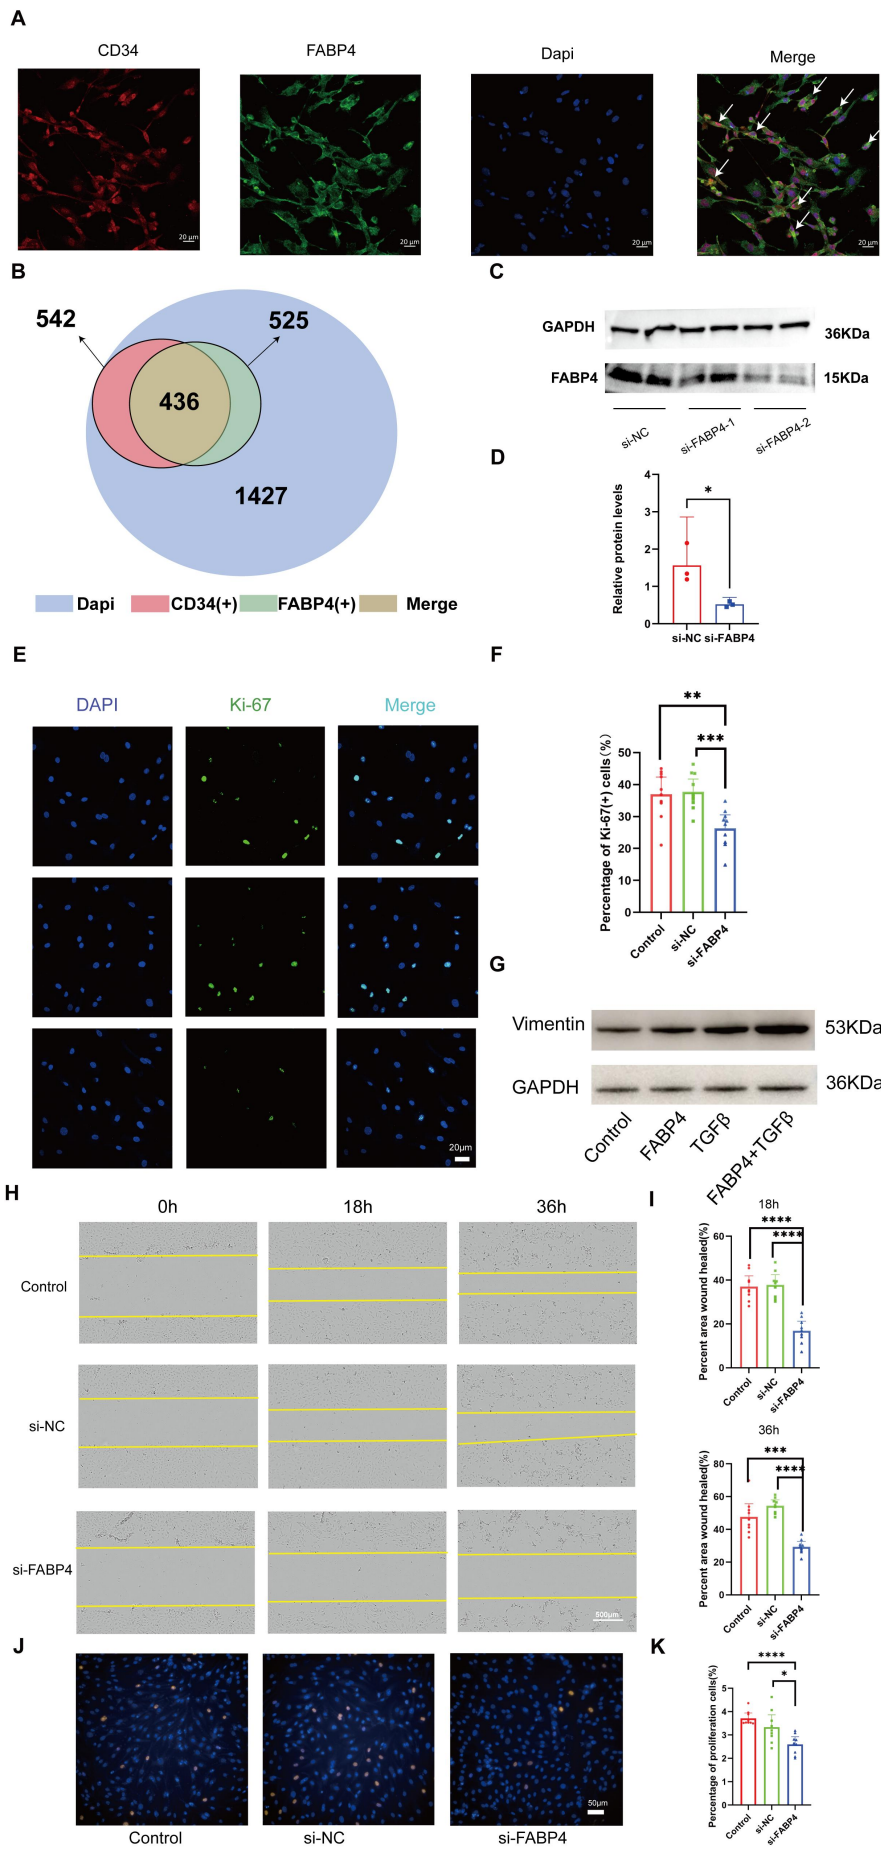

1 **Figure S10. Supplementary figures on function of FABP4 in VEC**

2 **A.** Immunostaining images showing the colocalization of CD34 and FABP4 in human  
3 VECs. **B.** A Venn diagram depicting the proportions of various positive cell types in  
4 cultured cells. **C, D** Western blot and quantity results of FABP4 and GAPDH **E.**  
5 Ki-67 proliferation assay of VECs. **F.** Quantitative analysis of the results of the Ki-67  
6 proliferation assay **G.** Western blot of Vimentin and GAPDH between groups. **H.**  
7 Representative images of human VECs from the cell scratch assay. **I.** Quantitative  
8 analysis of the results of the cell scratch assay. **J.** Representative images of EdU  
9 staining **K.** Quantitative analysis of the results of EdU staining. **(A).** Scale bar, 20  $\mu$ m.  
10 **(E).** Scale bar, 20  $\mu$ m. **(H).** Scale bar, 500  $\mu$ m. **(J).** Scale bar, 50  $\mu$ m. Points in each  
11 group in **D, F, I, K** represent 3, 10, 9 and 9 biological replicates, respectively. The  
12 data were normally distributed and had equal variance. One-way ANOVA followed  
13 by Tukey's multiple comparison test was used for multiple groups. A value of  $P < 0.05$   
14 was considered statistically significant.

15
