# Supplementary material for: Single-cell analysis reveals the loss of FABP4-positive proliferating valvular endothelial cells relates to functional mitral regurgitation
Source: PubMed Central journal article supplement — BMC Med. 2024 Dec 20;22:595. doi: 10.1186/s12916-024-03791-4 (PMC11662534; doi:10.1186/s12916-024-03791-4), 2024-12-20
Supplement: 12916_2024_3791_MOESM5_ESM.pdf [file 12916_2024_3791_MOESM5_ESM.pdf]

VIC0

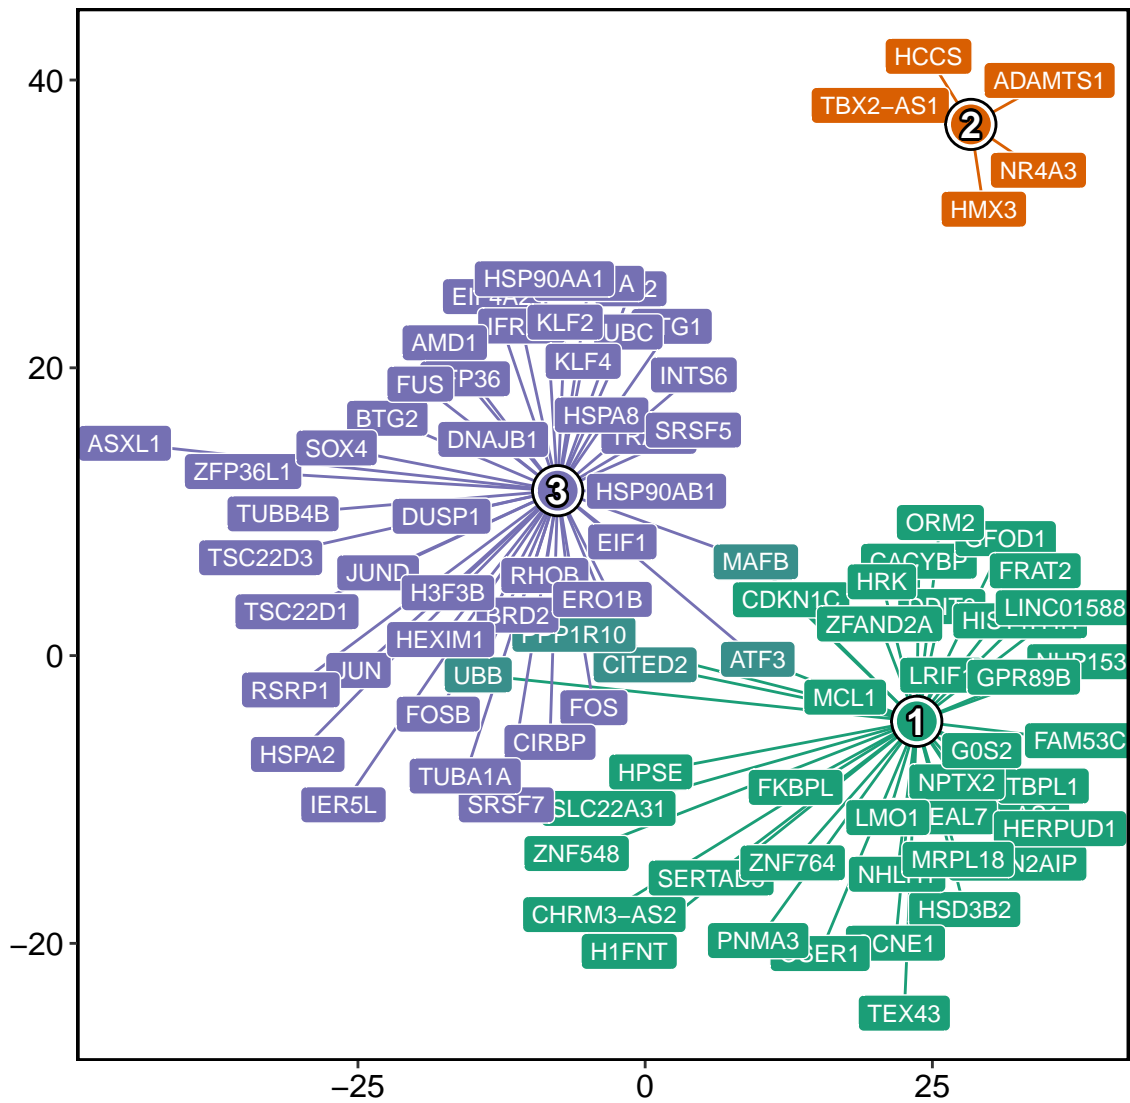

SCENIC

- Term:
- 1 TFGene:DDIT3
  - 2 TFGene:HMX3
  - 3 TFGene:JUN

# VIC1

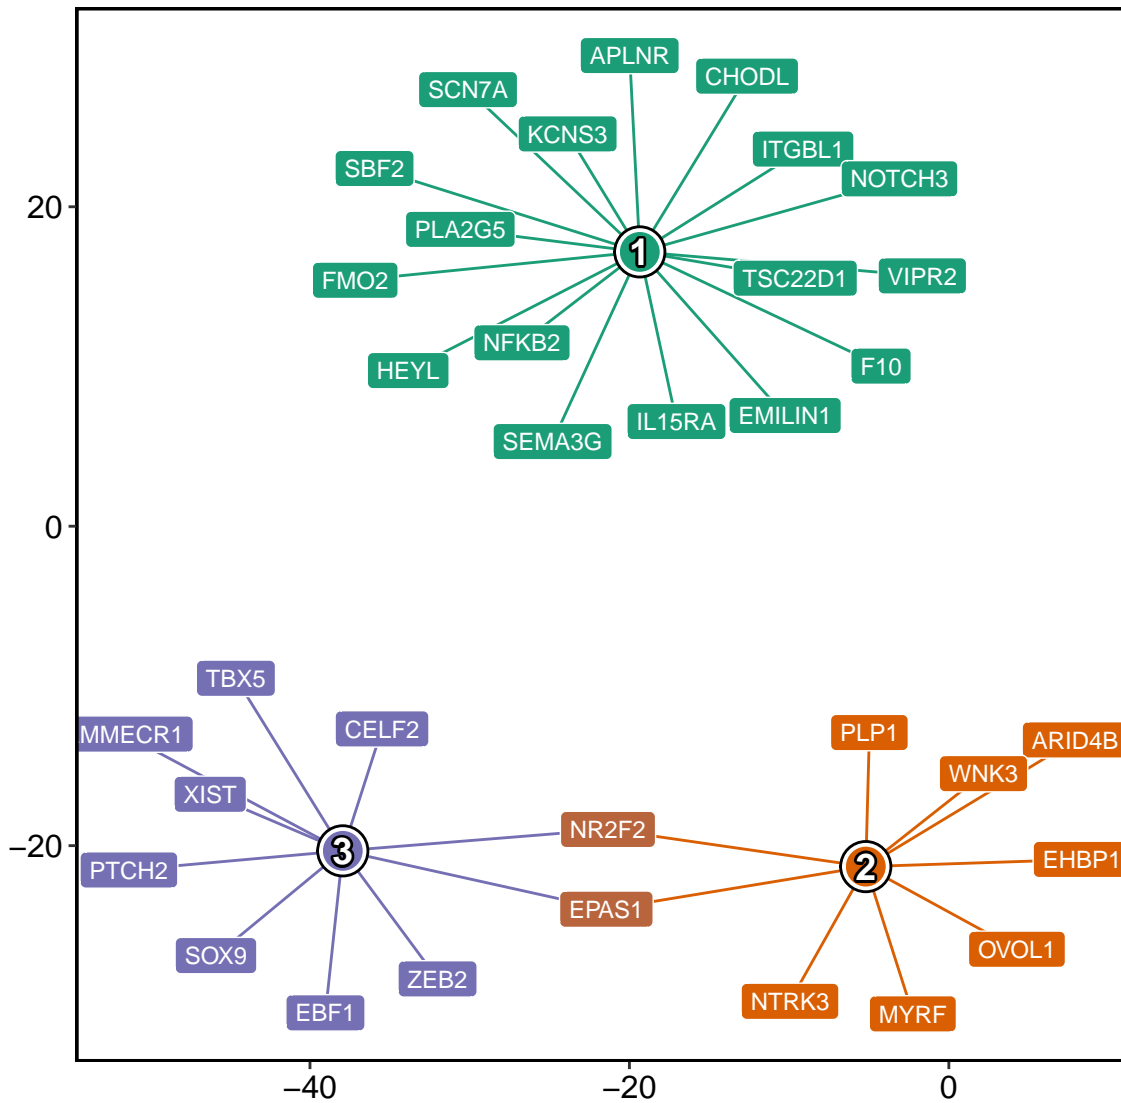

SCENIC

- Term:
- ① TFGene:MSC
  - ② TFGene:MYRF
  - ③ TFGene:EBF1

# VIC2

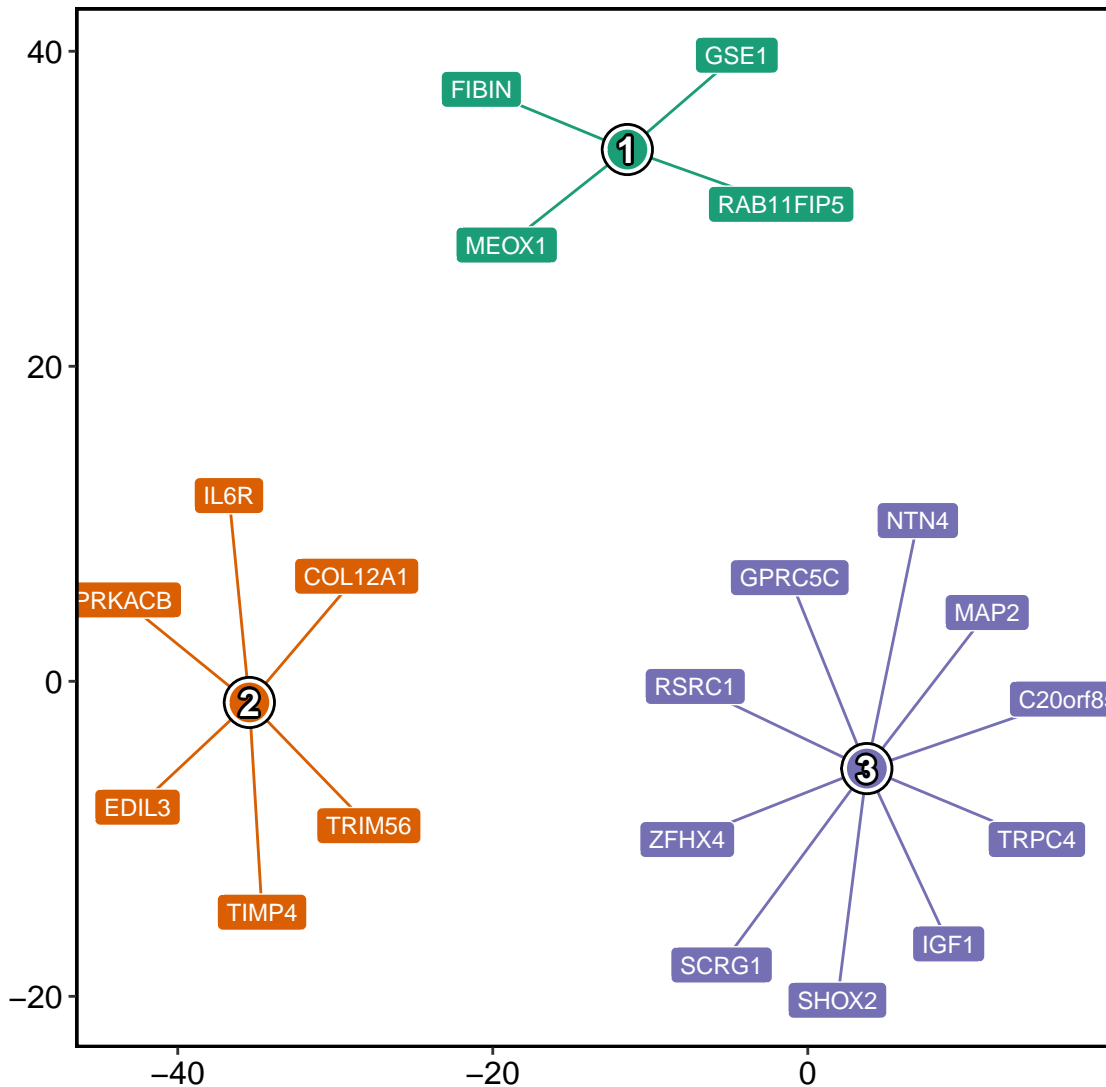

SCENIC

- Term:
- 1 TFGene:SIX1
  - 2 TFGene:IRF6
  - 3 TFGene:SHOX2

# VIC3

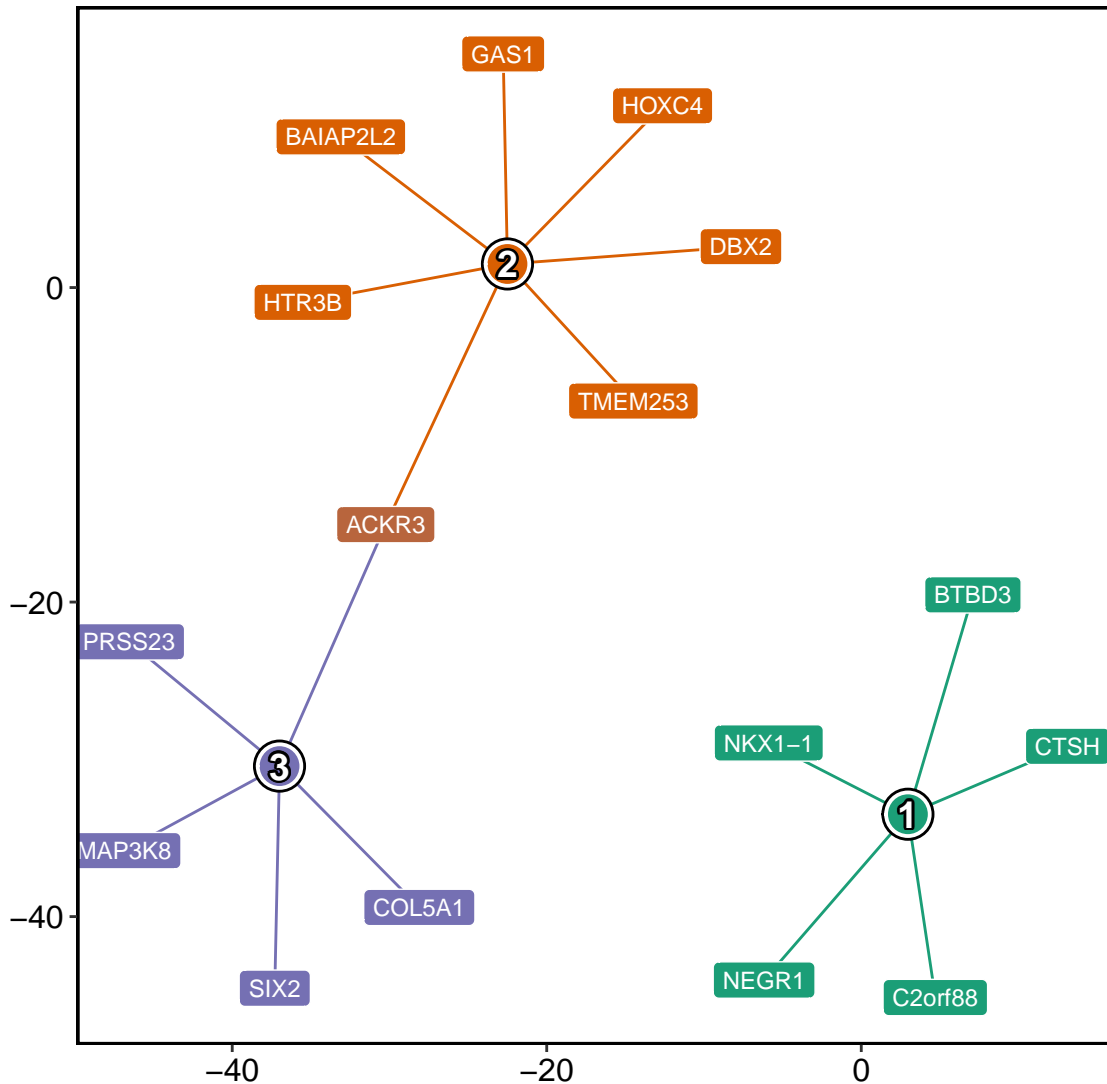

SCENIC

Term:

- 1 TFGene:BARX1
- 2 TFGene:HOXC4
- 3 TFGene:SIX2

VIC4

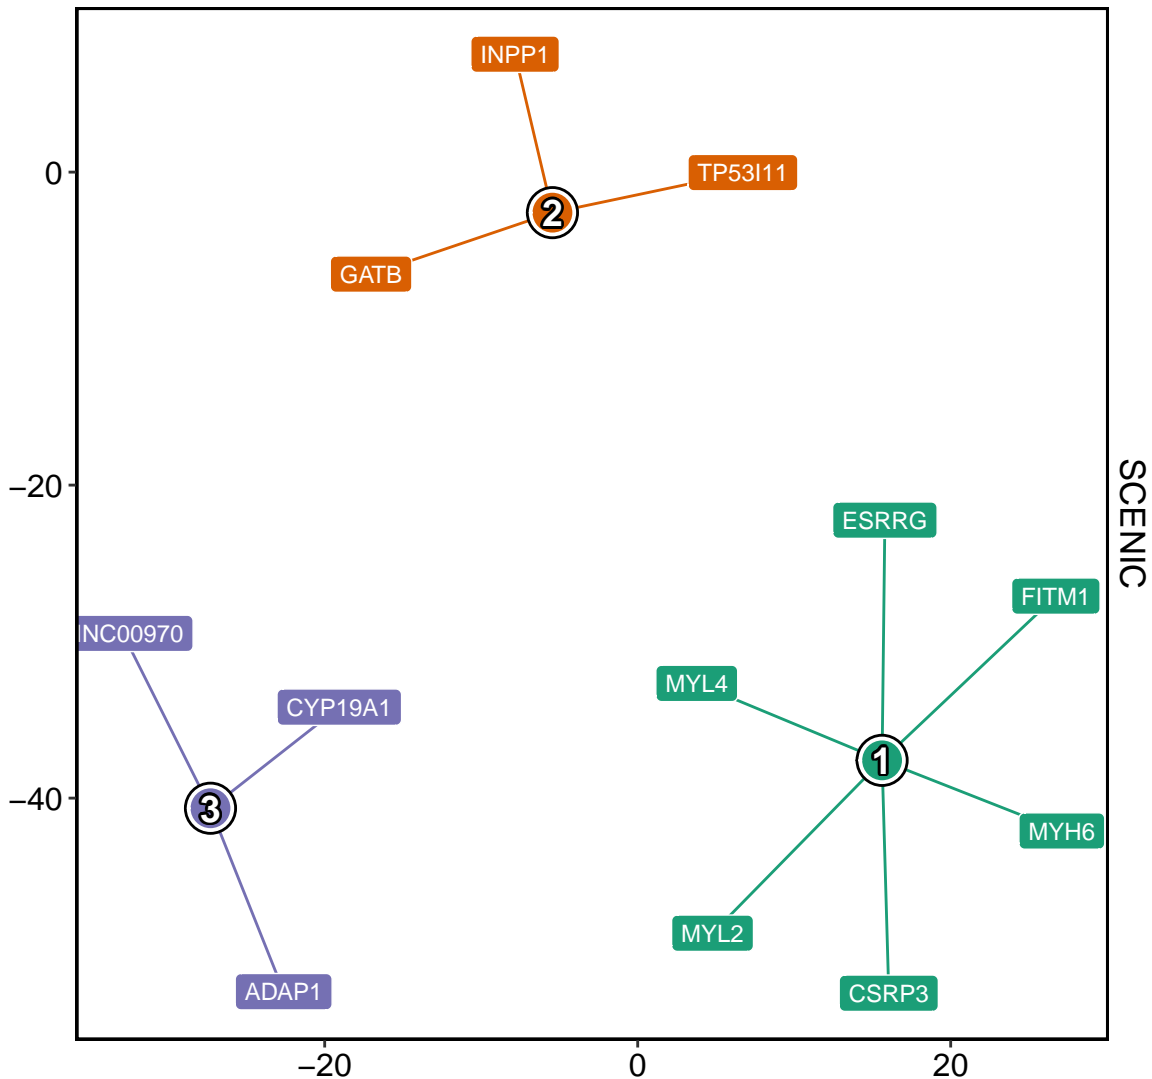

SCENIC

Term:

- 1 TFGene:ESRRG
- 2 TFGene:ILF2
- 3 TFGene:GCM1
