# Supplementary material for: Single-cell analysis reveals the loss of FABP4-positive proliferating valvular endothelial cells relates to functional mitral regurgitation
Source: PubMed Central journal article supplement — BMC Med. 2024 Dec 20;22:595. doi: 10.1186/s12916-024-03791-4 (PMC11662534; doi:10.1186/s12916-024-03791-4), 2024-12-20

# VECO

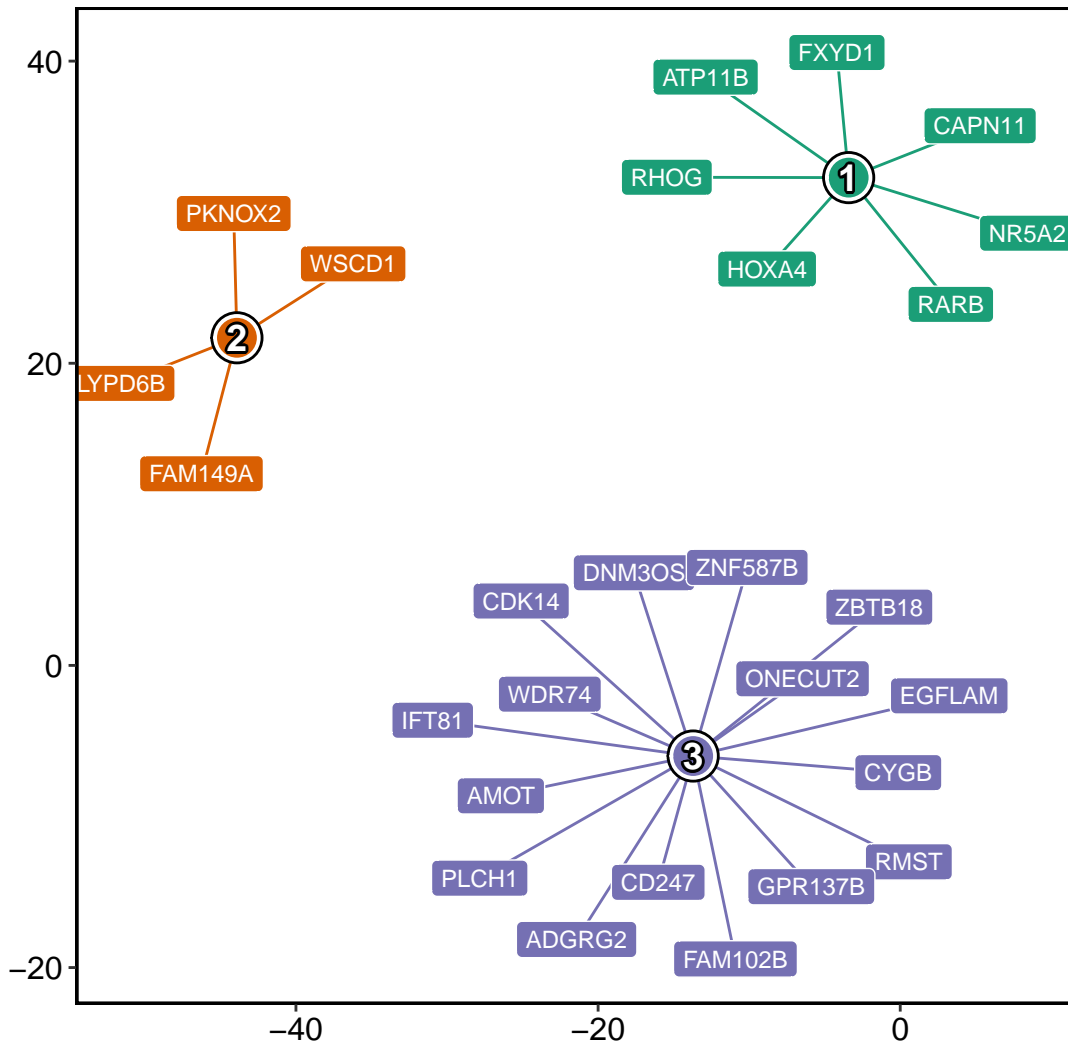

SCENIC

Term:

- ① TFGene:RARB
- ② TFGene:PKNOX2
- ③ TFGene:ONECUT2

VEC1

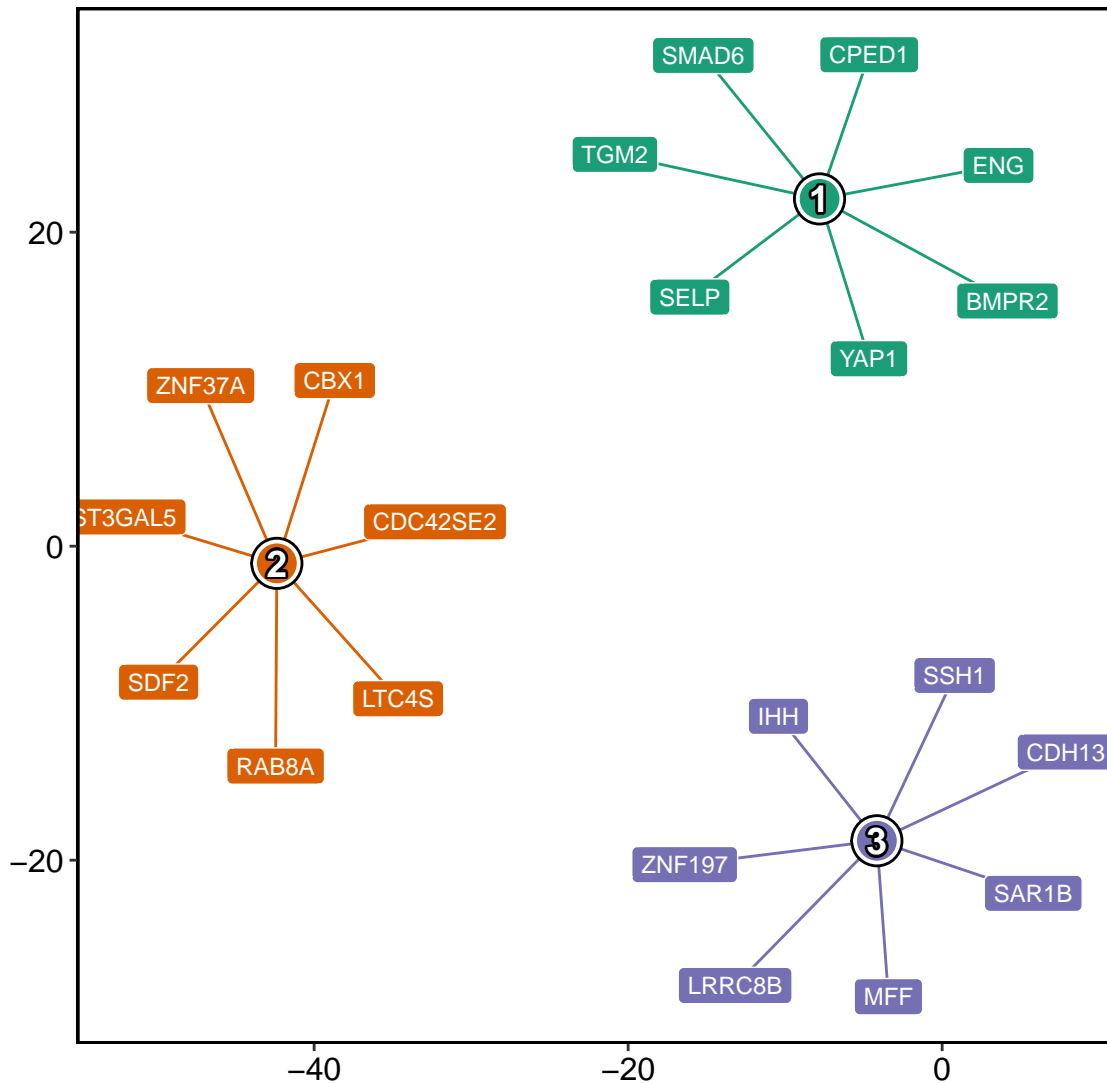

Term:

- 1 TFGene:SMAD6
- 2 TFGene:BAD
- 3 TFGene:HHAT

# VEC2

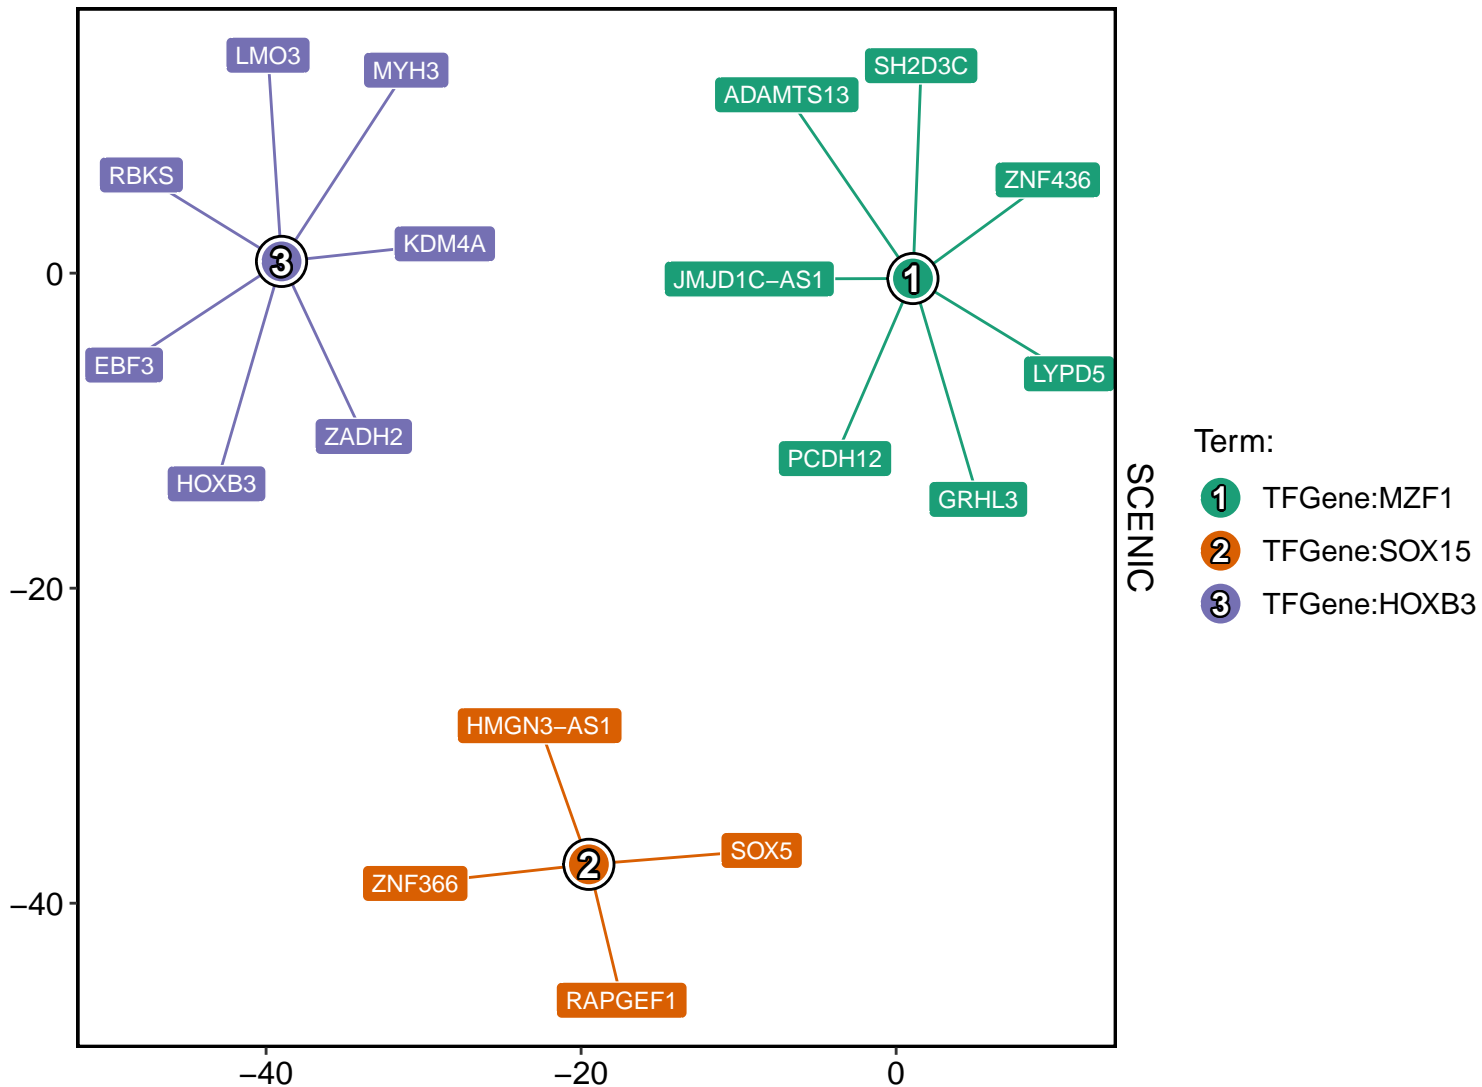

Supplement: 12916_2024_3791_MOESM10_ESM.pdf [file 12916_2024_3791_MOESM10_ESM.pdf]
