# Supplementary material for: Single-cell analysis reveals the loss of FABP4-positive proliferating valvular endothelial cells relates to functional mitral regurgitation
Source: PubMed Central journal article supplement — BMC Med. 2024 Dec 20;22:595. doi: 10.1186/s12916-024-03791-4 (PMC11662534; doi:10.1186/s12916-024-03791-4), 2024-12-20

Mye0

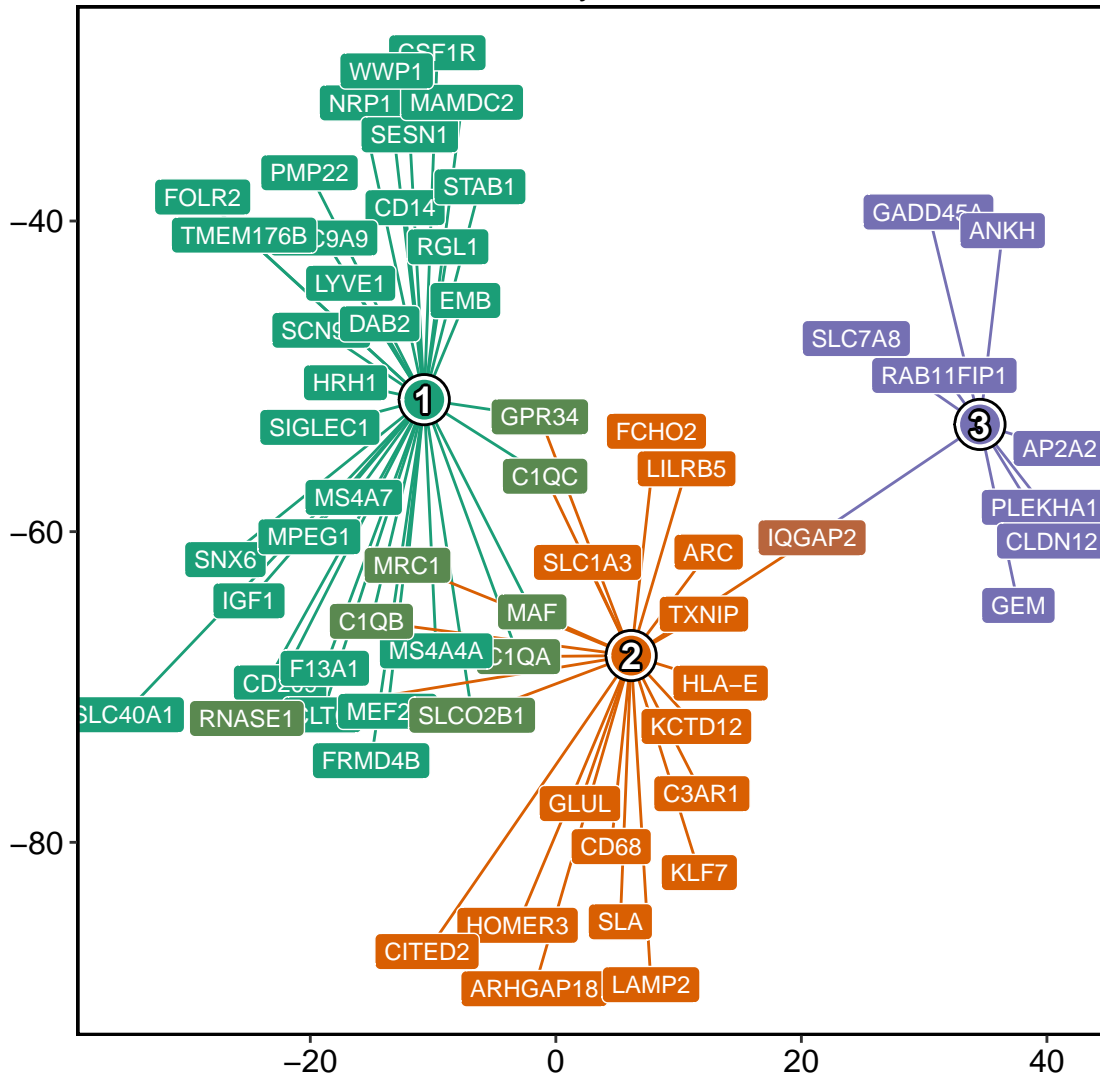

- Term:
- 1 TFGene:MAF
  - 2 TFGene:MAFB
  - 3 TFGene:NFE2L1

Mye1

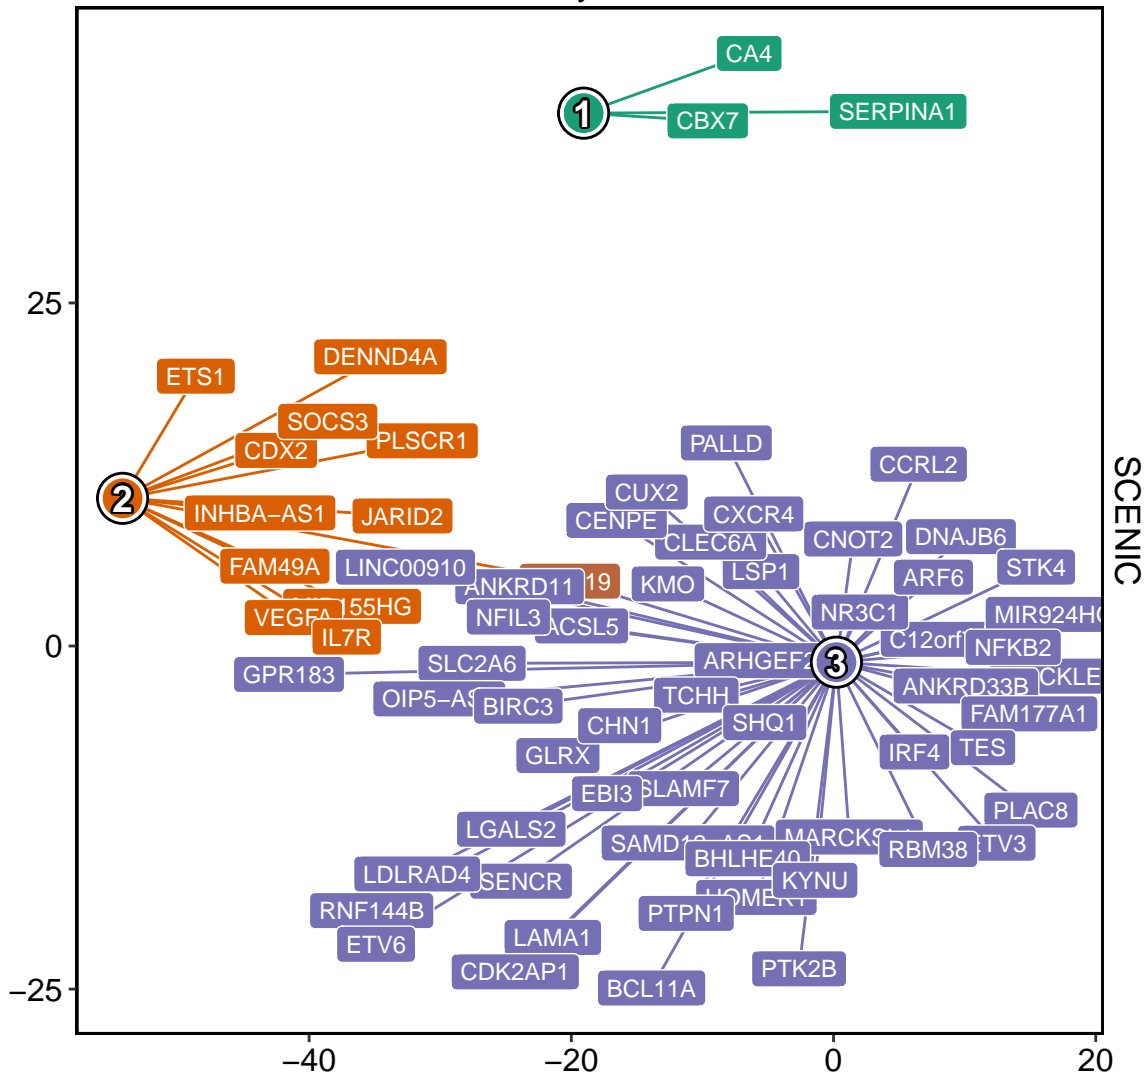

Term:

- 1 TFGene:NFE4
- 2 TFGene:STAT4
- 3 TFGene:BCL11A

SCENIC

# Mye2

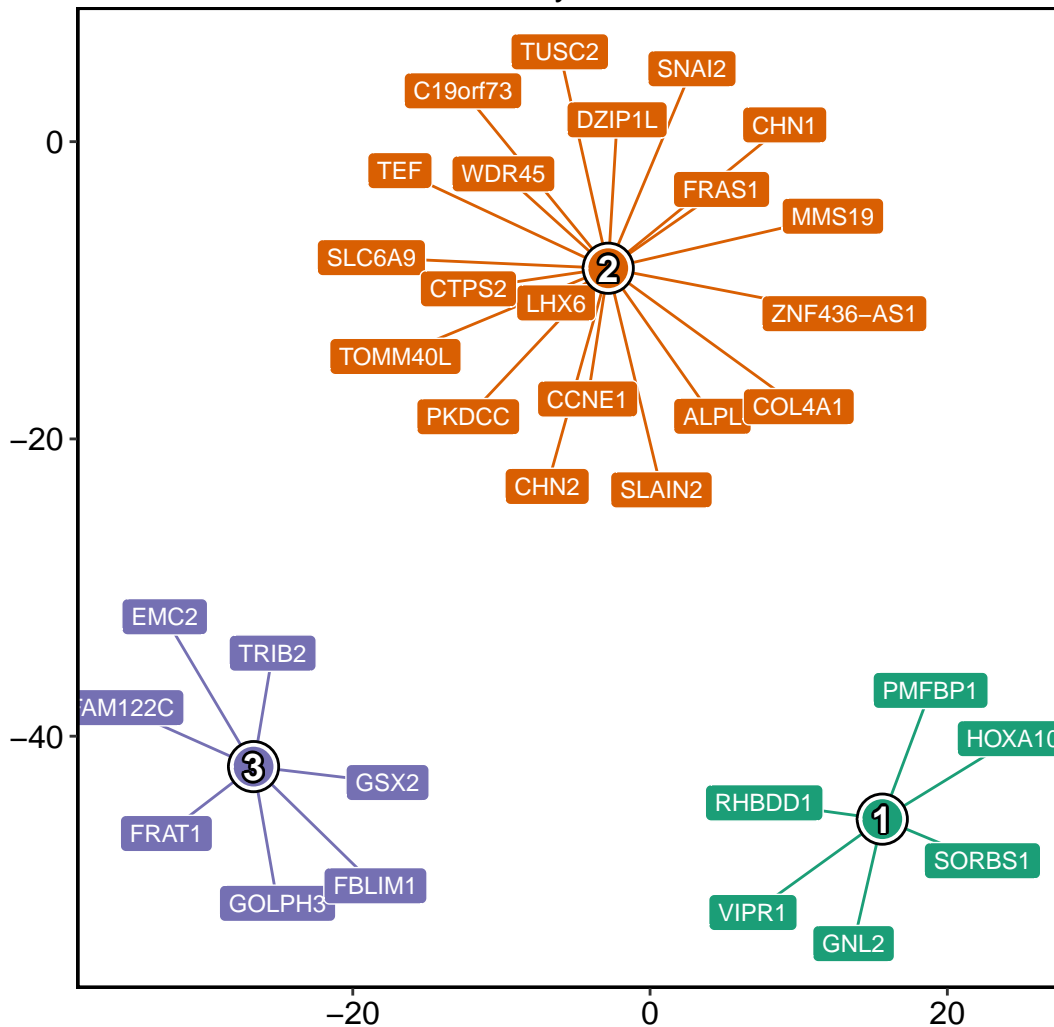

# Mye3

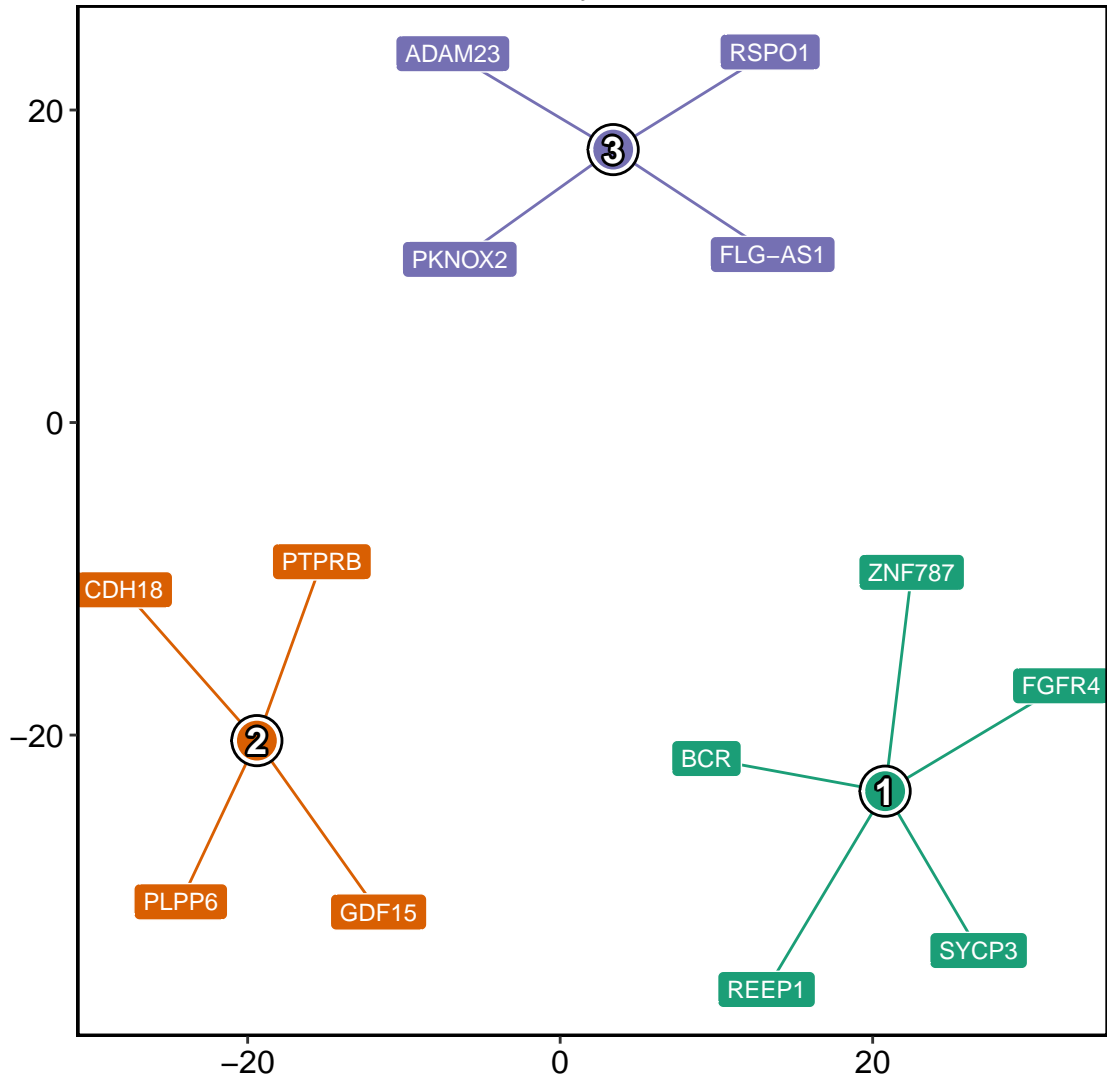

SCENIC

- Term:
- 1 TFGene:ZNF787
  - 2 TFGene:SOX7
  - 3 TFGene:FOXP1

# Mye4

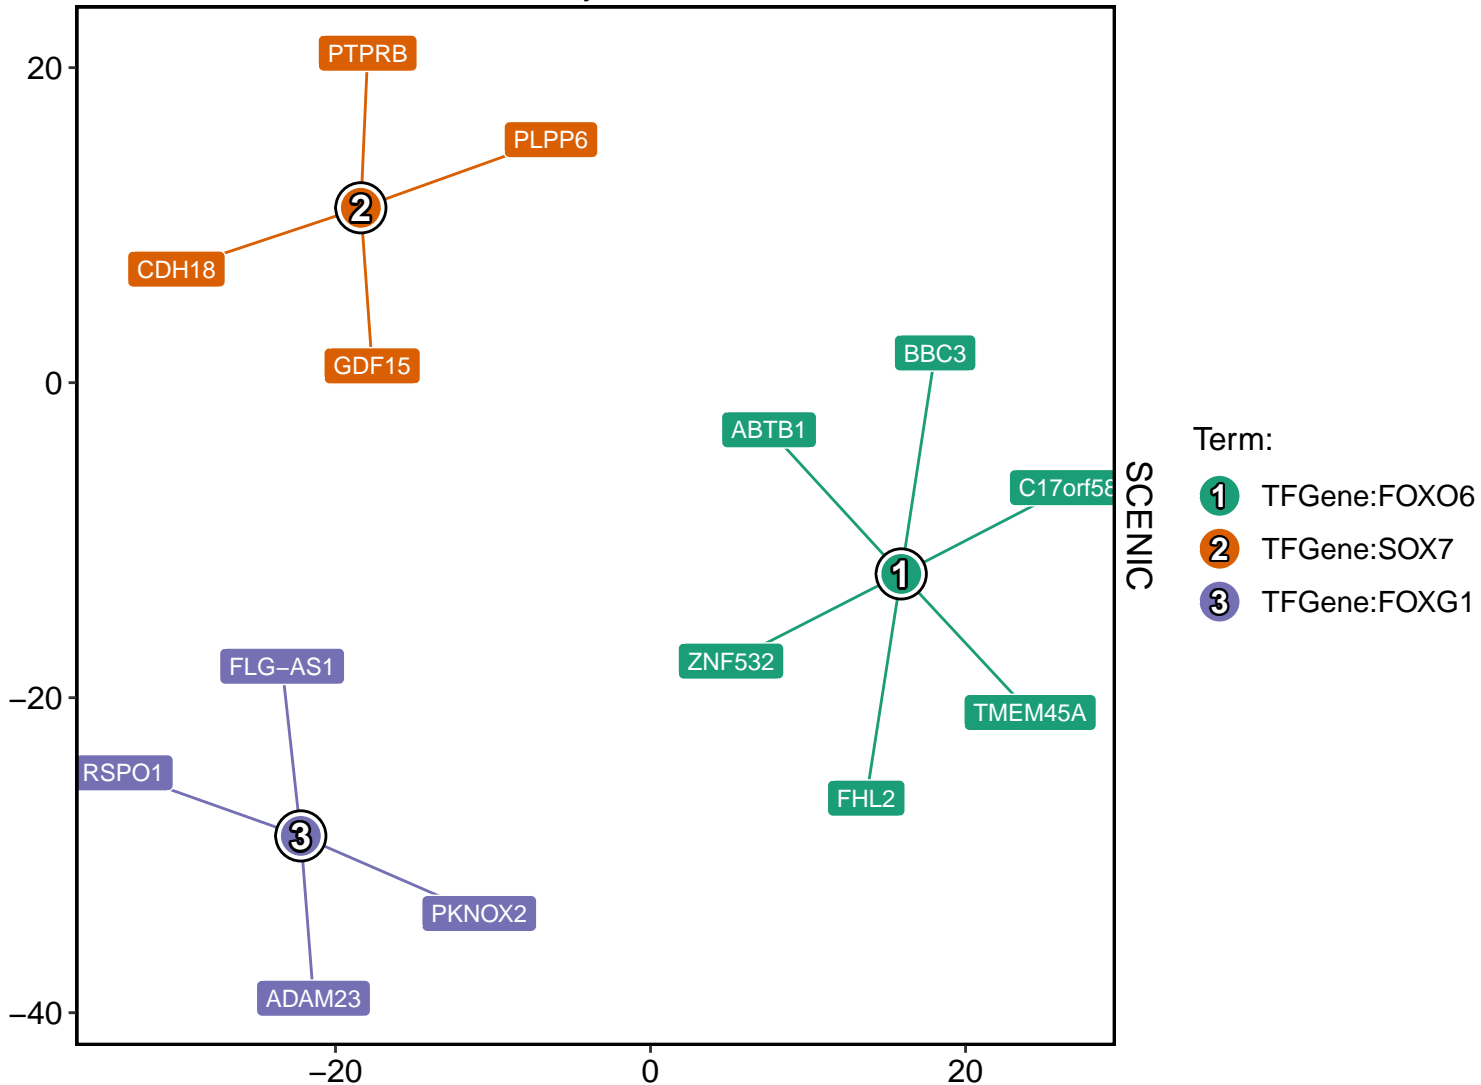

Supplement: 12916_2024_3791_MOESM15_ESM.pdf [file 12916_2024_3791_MOESM15_ESM.pdf]
