# Supplementary material for: Single-cell analysis reveals the loss of FABP4-positive proliferating valvular endothelial cells relates to functional mitral regurgitation
Source: PubMed Central journal article supplement — BMC Med. 2024 Dec 20;22:595. doi: 10.1186/s12916-024-03791-4 (PMC11662534; doi:10.1186/s12916-024-03791-4), 2024-12-20
Supplement: 12916_2024_3791_MOESM19_ESM.pdf [file 12916_2024_3791_MOESM19_ESM.pdf]

Lym0

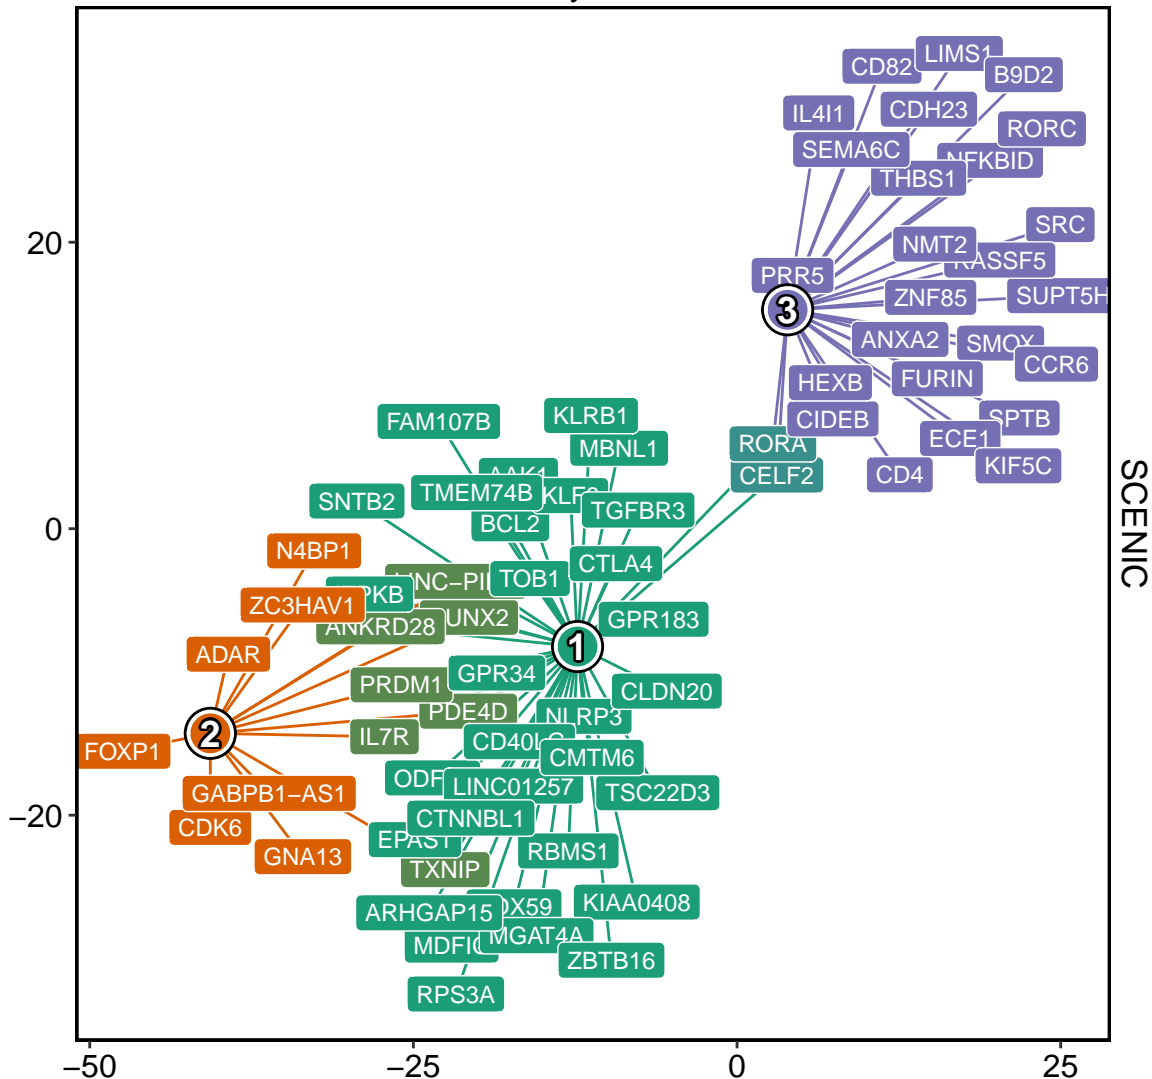

Lym1

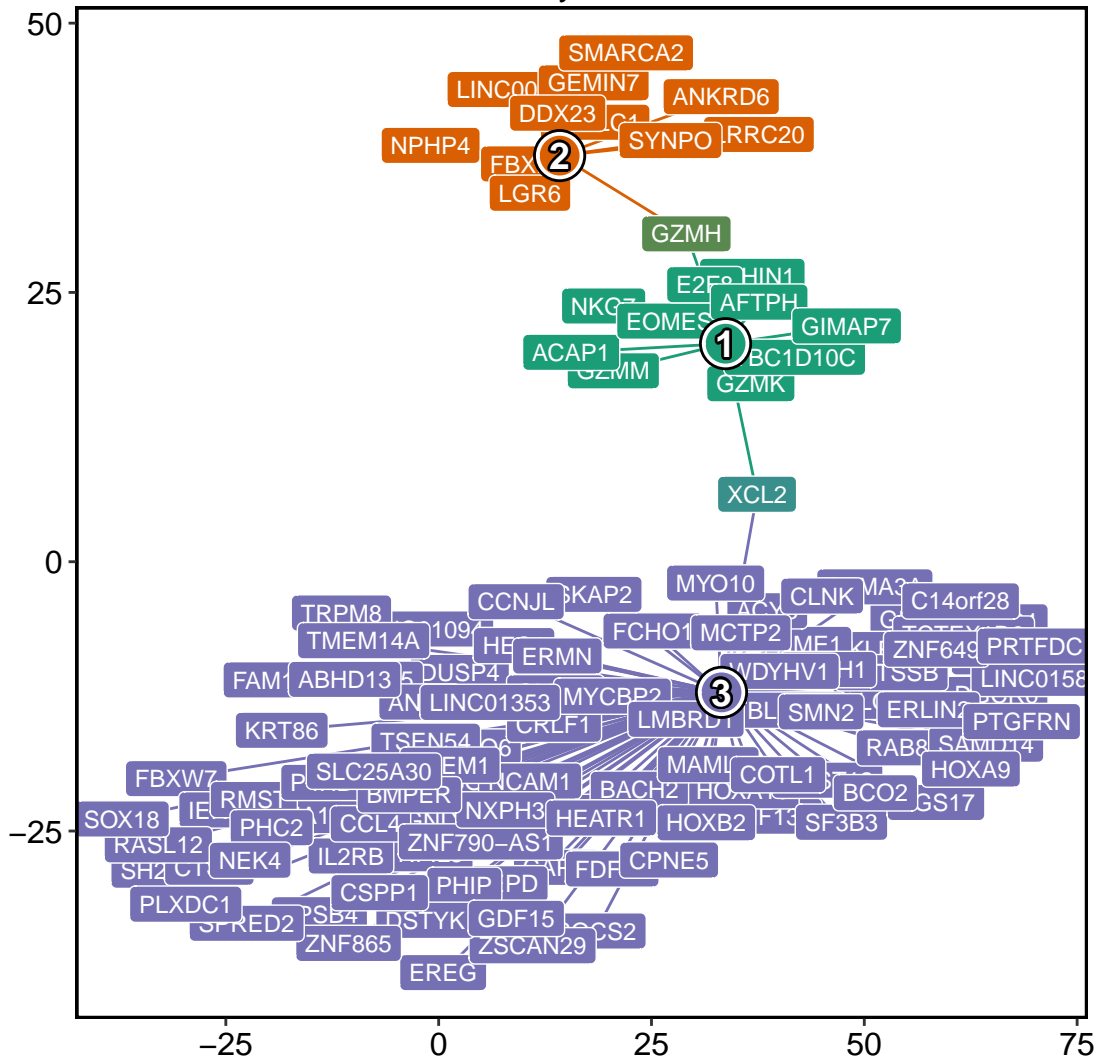

Term:

- ① TFGene:EOMES
- ② TFGene:ZNF780B
- ③ TFGene:HOXA10

# Lym2

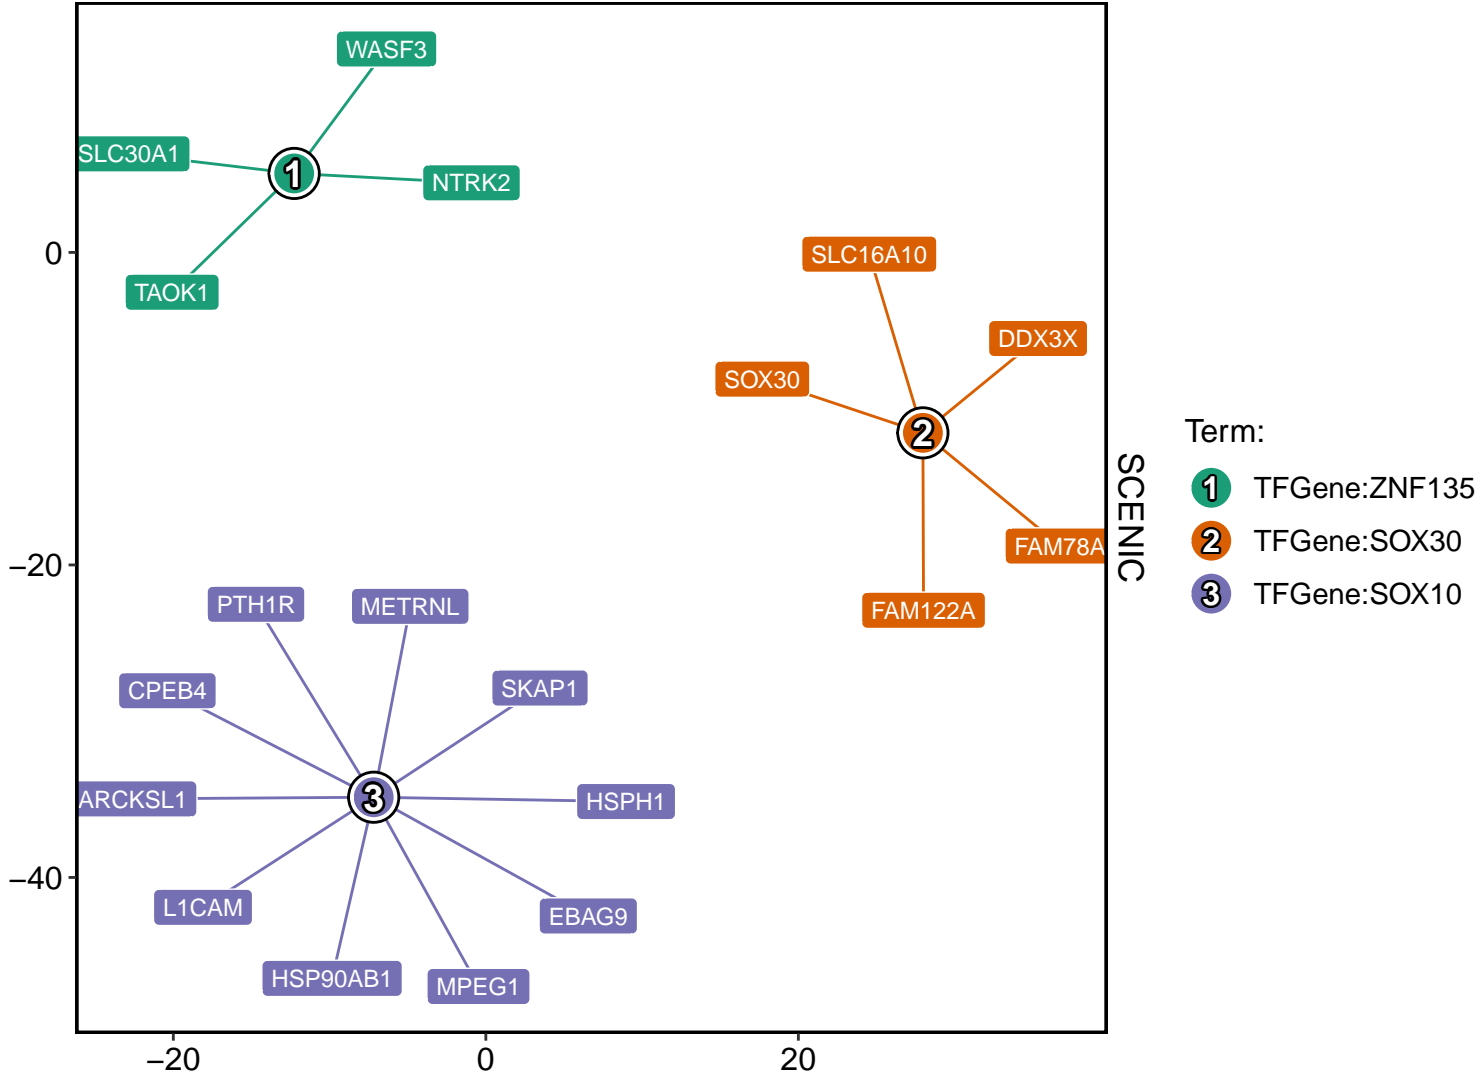

# Lym3

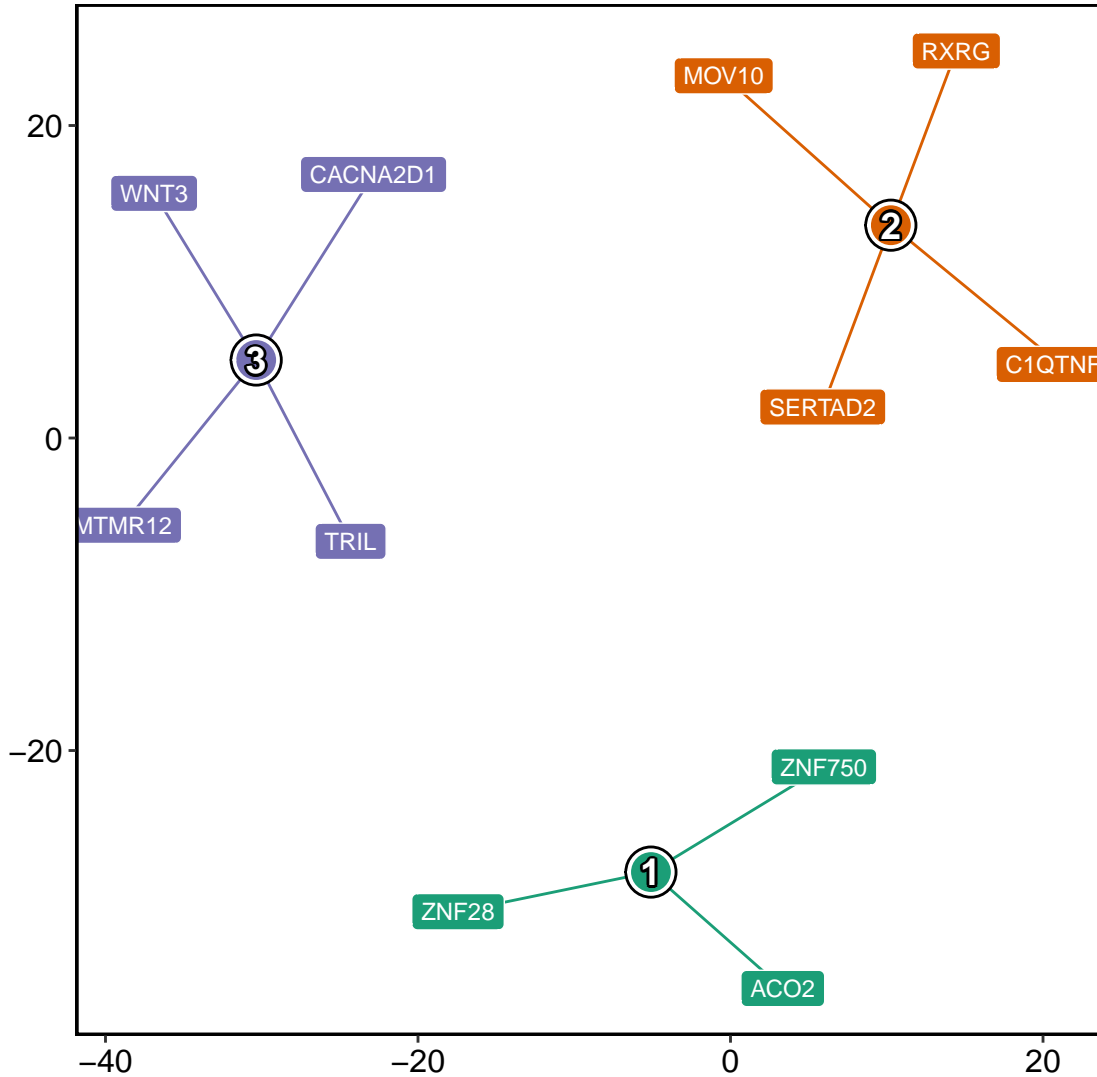

Term:

- 1 TFGene:ZNF233
- 2 TFGene:RXRG
- 3 TFGene:ZFP30

# Lym4

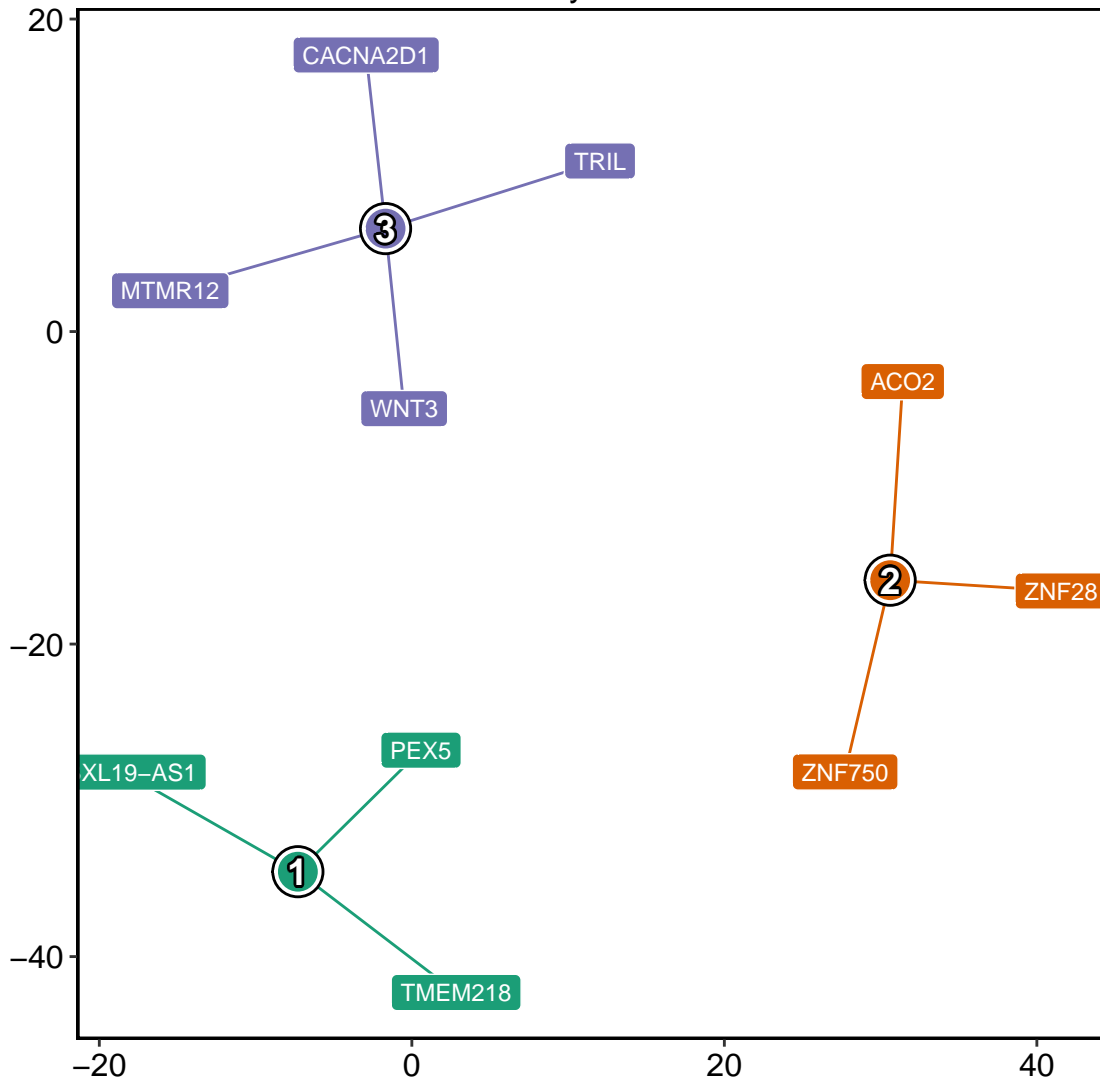

Term:

- 1 TFGene:ZNF532
- 2 TFGene:ZNF233
- 3 TFGene:ZFP30
